# Supplementary material for: Horizontal gene transfer and nucleotide compositional anomaly in large DNA viruses
Source: PubMed Central journal article supplement (PMC2211322; doi:10.1186/1471-2164-8-456), 2007-12-10
Supplement: 1471-2164-8-456-S1.pdf [file 1471-2164-8-456-S1.pdf]

Genomic G+C content of different groups of LDVs.

| <b>Classification</b>  | <b>Sub-classification</b>   | <b>Number of Species</b> | <b>Genome Size (kbp)</b> | <b>Genomic G+C (%)</b> |
|------------------------|-----------------------------|--------------------------|--------------------------|------------------------|
| <i>Asfarviridae</i>    | <i>Asfivirus</i>            | 1                        | 170                      | 39%                    |
| <i>Baculoviridae</i>   | <i>Nucleopolyhedrovirus</i> | 3                        | 155 - 161                | 40% - 57%              |
| <i>Baculoviridae</i>   | <i>Granulovirus</i>         | 1                        | 178                      | 40%                    |
| <i>Caudovirales</i>    | <i>Myoviridae</i>           | 14                       | 156 - 280                | 35% - 65%              |
| <i>Caudovirales</i>    | <i>Unclassified</i>         | 1                        | 185                      | 26%                    |
| <i>Herpesviridae</i>   | <i>Alphaherpesvirinae</i>   | 10                       | 150 - 174                | 44% - 76%              |
| <i>Herpesviridae</i>   | <i>Betaherpesvirinae</i>    | 10                       | 153 - 241                | 36% - 66%              |
| <i>Herpesviridae</i>   | <i>Gammaherpesvirinae</i>   | 3                        | 171 - 184                | 57% - 62%              |
| <i>Herpesviridae</i>   | <i>Unclassified</i>         | 1                        | 207                      | 39%                    |
| <i>Iridoviridae</i>    | <i>Lymphocystivirus</i>     | 1                        | 186                      | 27%                    |
| <i>Iridoviridae</i>    | <i>Iridovirus</i>           | 1                        | 212                      | 29%                    |
| <i>Mimiviridae</i>     | <i>Mimivirus</i>            | 1                        | 1181                     | 28%                    |
| <i>Nimaviridae</i>     | <i>Whispovirus</i>          | 1                        | 305                      | 41%                    |
| <i>Phycodnaviridae</i> | <i>Coccolithovirus</i>      | 1                        | 407                      | 40%                    |
| <i>Phycodnaviridae</i> | <i>Chlorovirus</i>          | 1                        | 330                      | 40%                    |
| <i>Phycodnaviridae</i> | <i>Phaeovirus</i>           | 1                        | 335                      | 52%                    |
| <i>Poxviridae</i>      | <i>Chordopoxvirinae</i>     | 12                       | 150 - 359                | 26% - 63%              |
| <i>Poxviridae</i>      | <i>Entomopoxvirinae</i>     | 2                        | 232 - 236                | 18%                    |
| <i>Unclassified</i>    | <i>Unclassified</i>         | 1                        | 228                      | 42%                    |
