# Supplementary material for: Horizontal gene transfer and nucleotide compositional anomaly in large DNA viruses
Source: PubMed Central journal article supplement (PMC2211322; doi:10.1186/1471-2164-8-456), 2007-12-10
Supplement: 1471-2164-8-456-S6.pdf [file 1471-2164-8-456-S6.pdf]

Sub-strands classification, according to their nucleotide-skew, for 15 LDV genomes.

| LDV                                      | Class I segments                                                   |          | Class II segments                                                  |          | Fisher's test |
|------------------------------------------|--------------------------------------------------------------------|----------|--------------------------------------------------------------------|----------|---------------|
|                                          | Position                                                           | CDS*     | Position                                                           | CDS*     | p-value       |
| <b>Mycobacteriophage Bxzl</b>            | 0..156102                                                          | 143 (27) | complement(0..156102)                                              | 4 (0)    | 1             |
| <b>Pseudomonas phage phiKZ</b>           | 0..280334                                                          | 229 (22) | complement(0..280334)                                              | 49 (5)   | 0.99          |
| <b>Tupaïid herpesvirus 1</b>             | 0..13000, complement(13000..108000),<br>180000..195859             | 83 (34)  | complement(0..13000), 13000..108000,<br>complement(180000..195859) | 61 (25)  | 1             |
| <b>Human herpesvirus 5 strain AD169</b>  | complement(0..93000), 93000..190000,<br>complement(190000..230287) | 73 (19)  | 0..93000, complement(93000..190000),<br>190000..230287             | 72 (34)  | 0.0098        |
| <b>Human herpesvirus 5 strain merlin</b> | complement(0..93000), 93000..200000,<br>complement(200000..235645) | 71 (17)  | 0..93000, complement(93000..200000),<br>200000..235645)            | 82 (39)  | 0.002         |
| <b>Human herpesvirus 6(A)</b>            | complement(0..68000), 68000..135000,<br>complement(135000..159321) | 61 (4)   | 0..68000, complement(68000..135000),<br>135000..159321             | 46 (7)   | 0.2           |
| <b>Human herpesvirus 6B</b>              | complement(0..68000), 68000..140000,<br>complement(140000..162114) | 54 (4)   | 0..68000, complement(68000.140000),<br>140000..162114              | 37 (2)   | 1             |
| <b>Human herpesvirus 7</b>               | complement(0..62000), 62000..140000,<br>complement(140000..153080) | 43 (2)   | 0..62000, complement(62000..140000),<br>140000..143080             | 35 (6)   | 0.13          |
| <b>Fowlpox virus</b>                     | 0..125000, complement(125000..288539)                              | 71 (7)   | complement(0..125000), 125000..288539                              | 159 (5)  | 0.05          |
| <b>Canarypox virus</b>                   | 0..175000, complement(175000..359853)                              | 93 (8)   | complement(0..175000), 175000..359853                              | 198 (6)  | 0.072         |
| <b>A.moorei entomopoxvirus</b>           | 0..232392                                                          | 94 (7)   | complement(0..232392)                                              | 124 (9)  | 0.99          |
| <b>Invertebrate iridescent virus 6</b>   | 0..45000, complement(45000..113000),<br>113000..212482             | 74 (7)   | complement(0..45000), 45000..113000,<br>complement(113000..212482) | 104 (8)  | 0.78          |
| <b>Shrimp white spot syndrome virus</b>  | 0..305107                                                          | 133 (47) | complement(0..305107)                                              | 112 (49) | 0.19          |
| <b>African swine fever virus</b>         | complement(0..74000), 74000..161000,<br>complement(161000..170101) | 56 (9)   | 0..74000, complement(74000..161000),<br>161000..170101             | 73 (13)  | 0.81          |
| <b>A.polyphaga mimivirus</b>             | 0..380000, complement(380000..1181404)                             | 333 (28) | complement(0..380000), 380000..1181404                             | 577 (55) | 0.633         |

\* Number of CDS analysed in this study (i.e. length  $\geq$  100 amino-acids). Numbers of identified cA genes are shown in parentheses.
