# Supplementary material for: Horizontal gene transfer and nucleotide compositional anomaly in large DNA viruses
Source: PubMed Central journal article supplement (PMC2211322; doi:10.1186/1471-2164-8-456), 2007-12-10
Supplement: 1471-2164-8-456-S7.pdf [file 1471-2164-8-456-S7.pdf]

cA gene clusters of significant size in 11 LDV genomes.

| LDV                                     | Protein ID           | Annotation                                         | Statistical Test |
|-----------------------------------------|----------------------|----------------------------------------------------|------------------|
| <b>Human herpesvirus 5 strain AD169</b> | NP_899637            | Ig Fc-binding glycoprotein RL11                    | $p \leq 0.001$   |
|                                         | NP_899638            | Ig Fc-binding glycoprotein RL12                    |                  |
|                                         | NP_899639            | unknown                                            |                  |
|                                         | NP_039934            | unknown                                            |                  |
|                                         | NP_039935            | unknown                                            |                  |
|                                         | NP_039938            | unknown                                            |                  |
|                                         | NP_039939            | unknown                                            |                  |
|                                         | NP_039940            | unknown                                            |                  |
|                                         | NP_039941            | unknown                                            |                  |
|                                         | NP_039942            | unknown                                            |                  |
|                                         | NP_039943            | unknown                                            |                  |
|                                         | NP_783772            | unknown                                            |                  |
|                                         | NP_039945            | Membrane protein precursor                         |                  |
| NP_039947                               | unknown              |                                                    |                  |
| <b>Molluscum contagiosum virus</b>      | NP_044106            | Putative non-globular, membrane associated protein | $p \leq 0.009$   |
|                                         | NP_044108            | Putative membrane receptor                         |                  |
|                                         | NP_044109            | unknown                                            |                  |
|                                         | NP_044110            | Fllice-like protein (apoptosis regulator)          |                  |
|                                         | NP_044111            | Fllice-like protein (apoptosis regulator)          |                  |
|                                         | NP_044112            | Slam-like protein                                  |                  |
|                                         | NP_044113            | Slam-like protein                                  |                  |
| NP_044114                               | unknown              |                                                    |                  |
| <b>Meleagrid herpesvirus 1</b>          | NP_073361            | unknown                                            | $p \leq 0.003$   |
|                                         | NP_073362            | unknown w/ Pro-Asn repeat                          |                  |
|                                         | NP_073363            | unknown                                            |                  |
|                                         | NP_073364            | unknown                                            |                  |
| <b>Murid herpesvirus 2</b>              | NP_064217            | Glycoprotein L precursor                           | $p \leq 0.001$   |
|                                         | NP_064218            | Mucin (fragment)                                   |                  |
|                                         | NP_064219            | unknown                                            |                  |
|                                         | NP_064220            | unknown                                            |                  |
|                                         | NP_064221            | unknown                                            |                  |
|                                         | NP_064222            | unknown                                            |                  |
|                                         | NP_064223            | unknown                                            |                  |
|                                         | NP_064224            | unknown                                            |                  |
|                                         | NP_064225            | unknown                                            |                  |
|                                         | NP_064226            | unknown                                            |                  |
|                                         | NP_064227            | unknown                                            |                  |
|                                         | NP_064228            | unknown                                            |                  |
|                                         | NP_064229            | Large tegument protein                             |                  |
|                                         | NP_064230            | unknown                                            |                  |
|                                         | NP_064231            | unknown                                            |                  |
|                                         | NP_064232            | unknown                                            |                  |
|                                         | NP_064233            | unknown                                            |                  |
|                                         | NP_064234            | unknown                                            |                  |
|                                         | NP_064235            | unknown                                            |                  |
|                                         | NP_064236            | unknown                                            |                  |
|                                         | NP_064237            | unknown                                            |                  |
|                                         | NP_064238            | Non-structural protein NS                          |                  |
|                                         | NP_064239            | Immediate-early protein 2 (IE2)                    |                  |
|                                         | NP_064240            | CC chemokine homolog                               |                  |
|                                         | NP_064241            | unknown                                            |                  |
|                                         | NP_064243            | unknown                                            | $p \leq 0.001$   |
|                                         | NP_064244            | unknown                                            |                  |
|                                         | NP_064245            | unknown                                            |                  |
|                                         | NP_064246            | unknown                                            |                  |
|                                         | NP_064247            | Tegument protein                                   |                  |
|                                         | NP_064248            | Tegument protein                                   |                  |
|                                         | NP_064249            | Tegument protein                                   |                  |
|                                         | NP_064250            | unknown                                            |                  |
| NP_064251                               | MHC class Ib antigen |                                                    |                  |
| NP_064252                               | unknown              |                                                    |                  |
| NP_064253                               | unknown              |                                                    |                  |
| NP_064254                               | unknown              |                                                    |                  |
| NP_064255                               | unknown              |                                                    |                  |
| NP_064256                               | unknown              |                                                    |                  |
| NP_064257                               | unknown              |                                                    |                  |
| NP_064258                               | unknown              |                                                    |                  |
| NP_064259                               | unknown              |                                                    |                  |
| NP_064260                               | unknown              |                                                    |                  |
| NP_064261                               | unknown              |                                                    |                  |
| NP_064262                               | unknown              |                                                    |                  |
| NP_064263                               | unknown              |                                                    |                  |
| NP_064264                               | unknown              |                                                    |                  |
| NP_064265                               | unknown              |                                                    |                  |
| NP_064266                               | unknown              |                                                    |                  |
| NP_064267                               | unknown              |                                                    |                  |
| NP_064268                               | unknown              |                                                    |                  |
| NP_064269                               | unknown              |                                                    |                  |
| NP_064270                               | unknown              |                                                    |                  |
| NP_064271                               | unknown              |                                                    |                  |
| NP_064272                               | unknown              |                                                    |                  |
| NP_064273                               | unknown              |                                                    |                  |
| NP_064274                               | unknown              |                                                    |                  |

| LDV                               | Protein ID                          | Annotation                              | Statistical Test |                |
|-----------------------------------|-------------------------------------|-----------------------------------------|------------------|----------------|
| Tupaia herpesvirus 1              | NP_116344                           | unknown                                 | $p \leq 0.001$   |                |
|                                   | NP_116346                           | unknown                                 |                  |                |
|                                   | NP_116347                           | unknown                                 |                  |                |
|                                   | NP_116348                           | unknown                                 |                  |                |
|                                   | NP_116349                           | unknown                                 |                  |                |
|                                   | NP_116351                           | unknown                                 |                  |                |
|                                   | NP_116352                           | unknown                                 |                  |                |
|                                   | NP_116353                           | unknown                                 |                  |                |
|                                   | NP_116354                           | unknown                                 |                  |                |
|                                   | NP_116355                           | unknown                                 |                  |                |
|                                   | NP_116356                           | unknown                                 |                  |                |
|                                   | NP_116358                           | unknown                                 |                  |                |
|                                   | NP_116359                           | unknown                                 |                  |                |
|                                   | NP_116360                           | unknown                                 |                  |                |
| NP_116361                         | unknown                             |                                         |                  |                |
| NP_116362                         | unknown                             |                                         |                  |                |
| NP_116363                         | unknown                             |                                         |                  |                |
| NP_116364                         | unknown                             |                                         |                  |                |
| Pongine herpesvirus 4             | NP_612643                           | unknown                                 | $p \leq 0.001$   |                |
|                                   | NP_612644                           | Virion glycoprotein RL10                |                  |                |
|                                   | NP_612645                           | Ig Fc-binding glycoprotein RL11         |                  |                |
|                                   | NP_612646                           | Glycoprotein RL12                       |                  |                |
|                                   | NP_612647                           | Glycoprotein TRL13                      |                  |                |
|                                   | NP_612649                           | unknown                                 |                  |                |
|                                   | NP_612650                           | unknown                                 |                  |                |
|                                   | NP_612651                           | Glycoprotein UL6                        |                  |                |
|                                   | NP_612652                           | Glycoprotein UL7                        |                  |                |
|                                   | NP_612653                           | Glycoprotein UL8                        |                  |                |
|                                   | NP_612654                           | Glycoprotein UL9                        |                  |                |
|                                   | NP_612655                           | Glycoprotein UL10                       |                  |                |
|                                   | NP_612656                           | Glycoprotein UL11                       |                  |                |
|                                   | NP_612657                           | unknown                                 |                  |                |
|                                   | NP_612762                           | Glycoprotein UL139                      |                  | $p \leq 0.009$ |
|                                   | NP_612763                           | unknown                                 |                  |                |
|                                   | NP_612764                           | unknown                                 |                  |                |
| NP_612765                         | unknown                             |                                         |                  |                |
| NP_612766                         | unknown                             |                                         |                  |                |
| NP_612771                         | unknown                             |                                         |                  |                |
| NP_612772                         | unknown                             |                                         |                  |                |
| NP_612773                         | unknown                             |                                         |                  |                |
| NP_612774                         | unknown                             |                                         |                  |                |
| NP_612775                         | Transcriptional transactivator TRS1 |                                         |                  |                |
| NP_612776                         | unknown                             |                                         |                  |                |
| Human herpesvirus 5 strain merlin | YP_081459                           | IgG Fc-binding glycoprotein RL11        | $p \leq 0.001$   |                |
|                                   | YP_081460                           | IgG Fc-binding glycoprotein RL12        |                  |                |
|                                   | YP_081461                           | Glycoprotein RL11 family member         |                  |                |
|                                   | YP_081462                           | Glycoprotein RL11 family member         |                  |                |
|                                   | YP_081464                           | unknown                                 |                  |                |
|                                   | YP_081465                           | unknown                                 |                  |                |
|                                   | YP_081466                           | Glycoprotein RL11 family member         |                  |                |
|                                   | YP_081467                           | Glycoprotein RL11 family member         |                  |                |
|                                   | YP_081468                           | Glycoprotein RL11 family member         |                  |                |
|                                   | YP_081469                           | Glycoprotein RL11 family member         |                  |                |
| YP_081470                         | Glycoprotein RL11 family member     |                                         |                  |                |
| YP_081471                         | Glycoprotein RL11 family member     |                                         |                  |                |
| YP_081472                         | unknown                             |                                         |                  |                |
| African swine fever virus         | NP_042702                           | unknown                                 | $p \leq 0.008$   |                |
|                                   | NP_042703                           | unknown                                 |                  |                |
|                                   | NP_042704                           | Structural protein p22                  |                  |                |
|                                   | NP_042706                           | unknown                                 |                  |                |
|                                   | NP_042707                           | unknown                                 |                  |                |
| Murid herpesvirus 1               | YP_214016                           | Glycoprotein family m02                 | $p \leq 0.001$   |                |
|                                   | YP_214017                           | Glycoprotein family m02                 |                  |                |
|                                   | YP_214018                           | Glycoprotein family m02                 |                  |                |
|                                   | YP_214019                           | Glycoprotein family m02                 |                  |                |
|                                   | YP_214020                           | Glycoprotein family m02                 |                  |                |
|                                   | YP_214021                           | Glycoprotein family m02                 |                  |                |
|                                   | YP_214022                           | Glycoprotein family m02                 |                  |                |
| YP_214023                         | Glycoprotein family m02             |                                         |                  |                |
| YP_214024                         | Glycoprotein family m02             |                                         |                  |                |
| Camelpox                          | NP_570395                           | unknown                                 | $p \leq 0.001$   |                |
|                                   | NP_570396                           | T1R protein                             |                  |                |
|                                   | NP_570398                           | unknown                                 |                  |                |
| Cyanophage P-SSM4                 | YP_214677                           | RNA-DNA / DNA-DNA helicase ATPase, UvsW | $p \leq 0.009$   |                |
|                                   | YP_214678                           | unknown                                 |                  |                |
|                                   | YP_214679                           | gp55 T4-like sigma factor               |                  |                |
|                                   | YP_214680                           | gp47 T4-like endonuclease               |                  |                |
|                                   | YP_214682                           | gp46 T4-like endonuclease               |                  |                |
