# Supplementary material for: Horizontal gene transfer and nucleotide compositional anomaly in large DNA viruses
Source: PubMed Central journal article supplement (PMC2211322; doi:10.1186/1471-2164-8-456), 2007-12-10
Supplement: 1471-2164-8-456-S8.pdf [file 1471-2164-8-456-S8.pdf]

List of the cA genes in the 67 LDV genomes

| Classification                         | Species                                 | Genome ID                     | Protein ID                                             | Annotation                                           | Functional Category                |
|----------------------------------------|-----------------------------------------|-------------------------------|--------------------------------------------------------|------------------------------------------------------|------------------------------------|
| <b>Asfarvirus</b>                      | <i>African swine fever virus</i>        | NC_001659.1                   | NP_042704.1                                            | Structural protein p22                               | Viral particle associated          |
|                                        |                                         |                               | NP_042727.1                                            | IAP homolog                                          | Immune system modulation           |
|                                        |                                         |                               | NP_042729.1                                            | Thymidylate kinase                                   | Nucleotide metabolism              |
|                                        |                                         |                               | NP_042751.1                                            | Lectin-like protein                                  | Immune system modulation           |
|                                        |                                         |                               | NP_042752.1                                            | CD2 homolog                                          | Host cell modulation               |
|                                        |                                         |                               | NP_042818.1                                            | Structural protein p54                               | Viral particle associated          |
|                                        |                                         |                               | Genes of unknown function: 16                          |                                                      |                                    |
| <b>Baculoviridae</b>                   | <i>Mamestra configurata NPV-A</i>       | NC_003529.1                   | NP_613130.1                                            | Actin-rearrangement-inducing factor                  | Host cell modulation               |
|                                        | NP_613232.1                             |                               | Late expression factor 11 (LEF-11)                     | DNA/RNA processing                                   |                                    |
|                                        | Genes of unknown function: 5            |                               |                                                        |                                                      |                                    |
| <i>Mamestra configurata NPV-B</i>      | NC_004117.1                             | NP_689217.1                   | Actin-rearrangement-inducing factor                    | Host cell modulation                                 |                                    |
| Genes of unknown function: 6           |                                         |                               |                                                        |                                                      |                                    |
| <b>Lymantria dispar MNPV</b>           | NC_001973.1                             | NP_047638.1                   | Capsid associated protein                              | Viral particle associated                            |                                    |
|                                        |                                         | NP_047640.1                   | Mucin-like protein                                     | Poorly characterized                                 |                                    |
|                                        |                                         | NP_047668.1                   | Ld-bro-a                                               | Poorly characterized                                 |                                    |
|                                        |                                         | NP_047674.1                   | Late expression factor 6                               | Poorly characterized                                 |                                    |
|                                        |                                         | NP_047679.1                   | Viral ubiquitin                                        | Translation and protein metabolism                   |                                    |
|                                        |                                         | NP_047681.1                   | Late expression factor 11                              | Poorly characterized                                 |                                    |
|                                        |                                         | NP_047700.1                   | Few polyhedra protein                                  | Viral particle formation                             |                                    |
|                                        |                                         | NP_047727.1                   | Telokin-like protein-20                                | Poorly characterized                                 |                                    |
|                                        |                                         | NP_047742.1                   | Capsid protein P80                                     | Viral particle associated                            |                                    |
|                                        |                                         | NP_047753.1                   | dUTPase                                                | Nucleotide metabolism                                |                                    |
|                                        |                                         | NP_047768.1                   | Occlusion-derived virus envelope protein E66 (ODV-E66) | Viral particle associated                            |                                    |
|                                        |                                         | NP_047783.1                   | Ld-bro-l                                               | Poorly characterized                                 |                                    |
|                                        |                                         | NP_047790.1                   | Ld-bro-n                                               | Poorly characterized                                 |                                    |
|                                        |                                         | NP_047791.1                   | Ld-bro-o                                               | Poorly characterized                                 |                                    |
|                                        |                                         | Genes of unknown function: 20 |                                                        |                                                      |                                    |
| <i>Xestia c-nigrum granulovirus</i>    | NC_002331.1                             | NP_059233.1                   | Fibroblast growth factor 1                             | Host cell modulation                                 |                                    |
|                                        |                                         | NP_059285.1                   | Putative inhibitor of apoptosis protein                | Immune system modulation                             |                                    |
| Genes of unknown function: 6           |                                         |                               |                                                        |                                                      |                                    |
| <b>Iridovirus</b>                      | <i>Lymphocystis disease virus</i>       | NC_005902.1                   | YP_073512.1                                            | Caspase-1 precursor                                  | Immune system modulation           |
|                                        | Genes of unknown function: 6            |                               |                                                        |                                                      |                                    |
| <i>Invertebrate iridescent virus 6</i> | NC_003038.1                             | Genes of unknown function: 15 |                                                        |                                                      |                                    |
| <b>Mimivirus</b>                       | <i>Acanthamoeba polyphaga mimivirus</i> | NC_006450.1                   | YP_142435.1                                            | Ankyrin containing protein                           | Poorly characterized               |
|                                        |                                         |                               | YP_142449.1                                            | Ankyrin containing protein                           | Poorly characterized               |
|                                        |                                         |                               | YP_142462.1                                            | PCNA                                                 | DNA/RNA processing                 |
|                                        |                                         |                               | YP_142522.1                                            | F-BOX domain                                         | Translation and protein metabolism |
|                                        |                                         |                               | YP_142565.1                                            | Etoposide-induced protein 24 (p53-induced protein 8) | Immune system modulation           |
|                                        |                                         |                               | YP_142586.1                                            | Serine/threonine protein kinase                      | Poorly characterized               |
|                                        |                                         |                               | YP_142654.1                                            | Endo/excinuclease amino terminal domain              | DNA/RNA processing                 |
|                                        |                                         |                               | YP_142665.1                                            | RING domain                                          | Poorly characterized               |
|                                        |                                         |                               | YP_142797.1                                            | Thioredoxin                                          | Translation and protein metabolism |
|                                        |                                         |                               | YP_142877.1                                            | Rhomboid family protein                              | Host cell modulation               |
|                                        |                                         |                               | YP_142956.1                                            | Ankyrin containing protein                           | Poorly characterized               |
| Genes of unknown function: 72          |                                         |                               |                                                        |                                                      |                                    |

| Classification              | Species                                      | Genome ID   | Protein ID                                                                   | Annotation                                   | Functional Category            |
|-----------------------------|----------------------------------------------|-------------|------------------------------------------------------------------------------|----------------------------------------------|--------------------------------|
| <b>Phycodnavirus</b>        | <i>Emiliana huxleyi virus 86</i>             | NC_007346.1 | YP_293786.1                                                                  | Putative membrane protein                    | Poorly characterized           |
|                             |                                              |             | YP_293842.1                                                                  | Putative membrane protein                    | Poorly characterized           |
| YP_293845.1                 |                                              |             | Putative membrane protein                                                    | Poorly characterized                         |                                |
| YP_293870.1                 |                                              |             | Putative membrane protein                                                    | Poorly characterized                         |                                |
| YP_293930.1                 |                                              |             | Putative membrane protein                                                    | Poorly characterized                         |                                |
| YP_294074.1                 |                                              |             | Putative membrane protein                                                    | Poorly characterized                         |                                |
| YP_294173.1                 |                                              |             | Putative fatty acid desaturase                                               | Other metabolism                             |                                |
|                             |                                              |             |                                                                              | Genes of unknown function: 37                |                                |
|                             | <i>Paramecium bursaria Chlorella virus 1</i> |             |                                                                              |                                              | Genes of unknown function: 117 |
|                             | <i>Ectocarpus siliculosus virus 1</i>        | NC_002687.1 | NP_077501.1                                                                  | Endonuclease                                 | DNA/RNA processing             |
|                             |                                              |             | NP_077571.1                                                                  | Transmembrane protein A                      | Poorly characterized           |
|                             |                                              |             | NP_077709.1                                                                  | Replication factor C3                        | DNA/RNA processing             |
|                             |                                              |             |                                                                              |                                              | Genes of unknown function: 22  |
| <b>Nimavirus</b>            | <i>Shrimp white spot syndrome virus</i>      |             |                                                                              |                                              | Genes of unknown function: 96  |
| <b>Unclassified virus</b>   | <i>Heliothis zea virus 1</i>                 | NC_004156.1 | NP_690426.1                                                                  | Dihydrofolate reductase                      | Nucleotide metabolism          |
|                             |                                              |             | NP_690455.1                                                                  | DNA ligase III                               | DNA/RNA processing             |
|                             |                                              |             | NP_690456.1                                                                  | FtsJ-like methyltransferase                  | DNA/RNA processing             |
|                             |                                              |             | NP_690540.1                                                                  | Very late factor 1 VLF-1                     | Poorly characterized           |
|                             |                                              |             | NP_690564.1                                                                  | Carboxylesterase                             | Other metabolism               |
|                             |                                              |             |                                                                              |                                              | Genes of unknown function: 20  |
| <b>Chordopoxvirus</b>       | <i>Monkeypox virus</i>                       | NC_003310.1 | NP_536611.1                                                                  | T1R protein                                  | Poorly characterized           |
|                             |                                              |             |                                                                              | Genes of unknown function: 2                 |                                |
|                             | <i>Camelpox virus</i>                        | NC_003391.1 | NP_570396.1                                                                  | T1R protein                                  | Poorly characterized           |
|                             |                                              |             | NP_570516.1                                                                  | Putative IMV membrane morphogenesis protein  | Viral particle formation       |
|                             |                                              |             |                                                                              | Genes of unknown function: 4                 |                                |
|                             | <i>Cowpox virus</i>                          | NC_003663.2 | NP_619933.1                                                                  | Putative phosphorylated IMV membrane protein | Viral particle formation       |
|                             |                                              |             |                                                                              | Genes of unknown function: 1                 |                                |
|                             | <i>Myxoma virus</i>                          | NC_001132.2 | NP_051821.1                                                                  | Putative phosphorylated IMV membrane protein | Viral particle formation       |
|                             |                                              |             | NP_051855.1                                                                  | Ig domain OX-2-like protein                  | Immune system modulation       |
|                             |                                              |             |                                                                              | Genes of unknown function: 3                 |                                |
| <i>Rabbit fibroma virus</i> | NC_001266.1                                  | NP_051901.1 | dUTPase                                                                      | Nucleotide metabolism                        |                                |
|                             |                                              | NP_051974.1 | MutT (NUDIX) protein                                                         | DNA/RNA processing                           |                                |
|                             |                                              | NP_051996.1 | Putative phosphorylated IMV membrane protein                                 | Viral particle formation                     |                                |
|                             |                                              | NP_052027.1 | Ig domain OX-2-like protein                                                  | Immune system modulation                     |                                |
|                             |                                              |             | Genes of unknown function: 0                                                 |                                              |                                |
| <i>Ectromelia virus</i>     | NC_004105.1                                  | NP_671525.1 | C-type lectin-like protein                                                   | Immune system modulation                     |                                |
|                             |                                              | NP_671639.1 | Putative phosphorylated IMV membrane protein                                 | Viral particle formation                     |                                |
|                             |                                              | NP_671657.1 | Leukocyte surface antigen CD47 precursor (Integrin-associated protein) (IAP) | Immune system modulation                     |                                |
|                             |                                              | NP_671661.1 | Putative type-I membrane glycoprotein                                        | Poorly characterized                         |                                |
|                             |                                              |             | Genes of unknown function: 2                                                 |                                              |                                |

| Classification                | Species                            | Genome ID   | Protein ID  | Annotation                                                                   | Functional Category       |
|-------------------------------|------------------------------------|-------------|-------------|------------------------------------------------------------------------------|---------------------------|
|                               | <i>Variola virus</i>               | NC_001611.1 | NP_042165.1 | Putative phosphorylated IMV membrane protein                                 | Viral particle formation  |
|                               |                                    |             | NP_042191.1 | Leukocyte surface antigen CD47 precursor (Integrin-associated protein) (IAP) | Immune system modulation  |
|                               |                                    |             | NP_042194.1 | Semaphorin                                                                   | Immune system modulation  |
|                               |                                    |             | NP_042198.1 | Putative type-I membrane glycoprotein                                        | Poorly characterized      |
|                               |                                    |             | NP_042218.1 | Ankyrin repeat protein                                                       | Poorly characterized      |
| Genes of unknown function: 1  |                                    |             |             |                                                                              |                           |
|                               | <i>Molluscum contagiosum virus</i> | NC_001731.1 | NP_043957.1 | Contains large predicted non-globular regions and Q/A repeats                | Poorly characterized      |
|                               |                                    |             | NP_043969.1 | Poxvirus F11 protein, an early protein.                                      | Poorly characterized      |
|                               |                                    |             | NP_044002.1 | Contains a predicted signal peptide and an immunoglobulin domain             | Poorly characterized      |
|                               |                                    |             | NP_044004.1 | Interleukin-18-binding protein precursor (IL-18BP) (Tadakinig-alfa).         | Immune system modulation  |
|                               |                                    |             | NP_044005.1 | Interleukin-18-binding protein precursor (IL-18BP) (Tadakinig-alfa).         | Immune system modulation  |
|                               |                                    |             | NP_044017.2 | Glutathione peroxidase                                                       | Immune system modulation  |
|                               |                                    |             | NP_044031.1 | MHC class I homolog                                                          | Immune system modulation  |
|                               |                                    |             | NP_044074.1 | DEAD-like helicases superfamily                                              | DNA/RNA processing        |
|                               |                                    |             | NP_044078.1 | Holliday junction resolvase                                                  | DNA/RNA processing        |
|                               |                                    |             | NP_044082.1 | A type inclusion protein                                                     | Viral particle formation  |
|                               |                                    |             | NP_044093.1 | Putative membrane protein                                                    | Poorly characterized      |
|                               |                                    |             | NP_044094.1 | Putative extracellular virion glycoprotein                                   | Viral particle associated |
|                               |                                    |             | NP_044097.1 | Putative extracellular enveloped virion protein                              | Viral particle associated |
|                               |                                    |             | NP_044099.1 | C-C chemokine-like protein                                                   | Immune system modulation  |
|                               |                                    |             | NP_044106.1 | Putative non-globular, membrane-associated protein                           | Poorly characterized      |
|                               |                                    |             | NP_044108.1 | Putative membrane receptor                                                   | Poorly characterized      |
|                               |                                    |             | NP_044110.1 | DED domain; CASP8 and FADD-like apoptosis regulator (FLICE-like protein)     | Immune system modulation  |
|                               |                                    |             | NP_044111.1 | DED domain; CASP8 and FADD-like apoptosis regulator (FLICE-like protein)     | Immune system modulation  |
|                               |                                    |             | NP_044112.1 | SLAM-like protein                                                            | Immune system modulation  |
|                               |                                    |             | NP_044113.1 | SLAM-like protein                                                            | Immune system modulation  |
| Genes of unknown function: 24 |                                    |             |             |                                                                              |                           |
|                               | <i>Canarypox virus</i>             | NC_005309.1 | NP_955026.1 | C-type lectin-like protein                                                   | Immune system modulation  |
|                               |                                    |             | NP_955062.1 | Chemokine-like receptor 1                                                    | Immune system modulation  |
|                               |                                    |             | NP_955068.1 | Chemokine-like receptor 1                                                    | Immune system modulation  |
|                               |                                    |             | NP_955338.1 | Chemokine receptor-like 1                                                    | Immune system modulation  |
|                               |                                    |             | NP_955349.1 | C-type lectin-like protein                                                   | Immune system modulation  |
| Genes of unknown function: 9  |                                    |             |             |                                                                              |                           |
|                               | <i>Fowlpox virus</i>               | NC_002188.1 | NP_038984.1 | C5a anaphylatoxin chemotactic receptor (C5a-R) (C5aR) (CD88 antigen).        | Immune system modulation  |
|                               |                                    |             | NP_038990.1 | Chemokine receptor-like                                                      | Immune system modulation  |
|                               |                                    |             | NP_039174.1 | C-type lectin-like protein                                                   | Immune system modulation  |
| Genes of unknown function: 9  |                                    |             |             |                                                                              |                           |
|                               | <i>Lumpy skin disease virus</i>    | NC_003027.1 | NP_150435.1 | Modulator of immune recognition 1 homolog                                    | Immune system modulation  |
|                               |                                    |             | NP_150444.1 | RING-variant domain                                                          | Poorly characterized      |
|                               |                                    |             | NP_150562.1 | Leukocyte surface antigen CD47 precursor (Integrin-associated protein) (IAP) | Immune system modulation  |
| Genes of unknown function: 1  |                                    |             |             |                                                                              |                           |

| Classification                | Species                                      | Genome ID   | Protein ID  | Annotation                                                 | Functional Category       |
|-------------------------------|----------------------------------------------|-------------|-------------|------------------------------------------------------------|---------------------------|
|                               | <i>Vaccinia virus</i>                        | NC_006998.1 | YP_233019.1 | Putative phosphorylated IMV membrane protein               | Viral particle formation  |
|                               |                                              |             | YP_233046.1 | Semaphorin-like protein                                    | Immune system modulation  |
|                               |                                              |             | YP_233061.1 | Secreted TNF-receptor-like protein                         | Immune system modulation  |
| Genes of unknown function: 0  |                                              |             |             |                                                            |                           |
| <b>Entomopoxvirus</b>         |                                              |             |             |                                                            |                           |
|                               | <i>Melanoplus sanguinipes entomopoxvirus</i> | NC_001993.1 |             | Genes of unknown function: 15                              |                           |
|                               | <i>Amsacta moorei entomopoxvirus 'L'</i>     | NC_002520.1 | NP_064975.1 | Protein phosphatase 1, regulatory subunit 15A              | Poorly characterized      |
|                               |                                              |             | NP_065005.1 | Similar to wingless protein receptor Cfz2                  | Poorly characterized      |
| Genes of unknown function: 14 |                                              |             |             |                                                            |                           |
| <b>Unclassified Poxvirus</b>  |                                              |             |             |                                                            |                           |
|                               | <i>Mule deer poxvirus</i>                    | NC_006966.1 | YP_227493.1 | Putative phosphorylated IMV membrane protein               | Viral particle formation  |
| Genes of unknown function: 1  |                                              |             |             |                                                            |                           |
| <b>Alphaherpesvirinae</b>     |                                              |             |             |                                                            |                           |
|                               | <i>Cercopithecine herpesvirus 16</i>         | NC_007653.1 | YP_443846.1 | Trans-acting transcriptional protein ICP0                  | DNA/RNA processing        |
|                               |                                              |             | YP_443847.1 | Virion membrane glycoprotein L                             | Viral particle associated |
|                               |                                              |             | YP_443859.1 | Probable serine/threonine-protein kinase                   | Viral particle associated |
|                               |                                              |             | YP_443860.1 | Minor tegument protein                                     | Viral particle associated |
|                               |                                              |             | YP_443870.1 | Nonglycosylated membrane-associated protein                | Poorly characterized      |
|                               |                                              |             | YP_443883.1 | Very large tegument protein                                | Viral particle associated |
|                               |                                              |             | YP_443896.1 | Capsid/tegument-associated phosphoprotein                  | Viral particle associated |
|                               |                                              |             | YP_443899.1 | Capsid/tegument-associated phosphoprotein                  | Viral particle associated |
|                               |                                              |             | YP_443902.1 | Immediate-early protein ICP27 (transcriptional activator)  | DNA/RNA processing        |
|                               |                                              |             | YP_443904.1 | Type II membrane protein; involved in virus pathogenicity  | Poorly characterized      |
|                               |                                              |             | YP_443905.1 | Immediate-early protein ICP0                               | DNA/RNA processing        |
|                               |                                              |             | YP_443907.1 | Immediate-early protein ICP22                              | DNA/RNA processing        |
|                               |                                              |             | YP_443908.1 | Tegument protein                                           | Viral particle associated |
|                               |                                              |             | YP_443910.1 | Virion membrane glycoprotein G; entry into polarized cells | Entry and exit            |
|                               |                                              |             | YP_443911.1 | Glycoprotein J blocking apoptosis                          | Immune system modulation  |
|                               |                                              |             | YP_443915.1 | Nucleolar phosphoprotein                                   | Poorly characterized      |
|                               |                                              |             | YP_443917.1 | Tegument protein                                           | Viral particle associated |
|                               |                                              |             | YP_443918.1 | RNA-binding tegument protein interacting with PKR          | Immune system modulation  |
| Genes of unknown function: 0  |                                              |             |             |                                                            |                           |
|                               | <i>Equid herpesvirus 1</i>                   | NC_001491.2 | YP_053054.1 | dUTPase                                                    | Nucleotide metabolism     |
|                               |                                              |             | YP_053062.1 | Virion membrane protein                                    | Viral particle associated |
|                               |                                              |             | YP_053083.1 | Virion protein                                             | Viral particle associated |
|                               |                                              |             | YP_053094.1 | Virion protein kinase (serine/threonine protein kinase)    | Viral particle associated |
|                               |                                              |             | YP_053106.1 | Envelop glycoprotein L                                     | Viral particle associated |
|                               |                                              |             | YP_053112.1 | Glycoprotein                                               | Poorly characterized      |
|                               |                                              |             | YP_053115.1 | Envelope glycoprotein                                      | Viral particle associated |
|                               |                                              |             | YP_053116.1 | Envelope glycoprotein                                      | Viral particle associated |
|                               |                                              |             | YP_053117.1 | Envelope glycoprotein                                      | Viral particle associated |
| Genes of unknown function: 3  |                                              |             |             |                                                            |                           |

| Classification | Species                                                   | Genome ID                 | Protein ID  | Annotation                                                | Functional Category       |                              |                                           |                           |
|----------------|-----------------------------------------------------------|---------------------------|-------------|-----------------------------------------------------------|---------------------------|------------------------------|-------------------------------------------|---------------------------|
|                | <i>Cercopithecine herpesvirus 1</i>                       | NC_004812.1               | NP_851859.1 | Trans-acting transcriptional protein ICP0                 | DNA/RNA processing        |                              |                                           |                           |
|                |                                                           |                           | NP_851860.1 | Virion glycoprotein L                                     | Viral particle associated |                              |                                           |                           |
|                |                                                           |                           | NP_851872.1 | Virion protein kinase                                     | Viral particle associated |                              |                                           |                           |
|                |                                                           |                           | NP_851873.1 | Minor tegument protein                                    | Viral particle associated |                              |                                           |                           |
|                |                                                           |                           | NP_851883.1 | Virion associated membrane prptein                        | Viral particle associated |                              |                                           |                           |
|                |                                                           |                           | NP_851886.1 | Scaffolding protein                                       | Viral particle formation  |                              |                                           |                           |
|                |                                                           |                           | NP_851896.1 | Very large tegument protein                               | Viral particle associated |                              |                                           |                           |
|                |                                                           |                           | NP_851898.1 | Capsid protein VP19C                                      | Viral particle associated |                              |                                           |                           |
|                |                                                           |                           | NP_851902.1 | DNA polymerase subunit                                    | DNA/RNA processing        |                              |                                           |                           |
|                |                                                           |                           | NP_851903.1 | Membrane-associated protein                               | Poorly characterized      |                              |                                           |                           |
|                |                                                           |                           | NP_851909.1 | Major tegument protein VP22                               | Viral particle associated |                              |                                           |                           |
|                |                                                           |                           | NP_851911.1 | dUTPase                                                   | Nucleotide metabolism     |                              |                                           |                           |
|                |                                                           |                           | NP_851912.1 | Capsid/tegument-associated phosphoprotein                 | Viral particle associated |                              |                                           |                           |
|                |                                                           |                           | NP_851915.1 | Immediate-early protein ICP27 (transcriptional activator) | DNA/RNA processing        |                              |                                           |                           |
|                |                                                           |                           | NP_851917.1 | Type II membrane protein                                  | Poorly characterized      |                              |                                           |                           |
|                |                                                           |                           | NP_851918.1 | Trans-acting transcriptional protein ICP0                 | DNA/RNA processing        |                              |                                           |                           |
|                |                                                           |                           | NP_851920.1 | Immediate-early protein ICP22                             | DNA/RNA processing        |                              |                                           |                           |
|                |                                                           |                           | NP_851921.1 | Tegument protein                                          | Viral particle associated |                              |                                           |                           |
|                |                                                           |                           | NP_851923.1 | Virion glycoprotein G                                     | Viral particle associated |                              |                                           |                           |
|                |                                                           |                           | NP_851926.1 | Virion glycoprotein I                                     | Viral particle associated |                              |                                           |                           |
|                |                                                           |                           | NP_851928.1 | Nucleolar phosphoprotein                                  | Poorly characterized      |                              |                                           |                           |
|                |                                                           |                           | NP_851930.1 | Tegument protein                                          | Viral particle associated |                              |                                           |                           |
|                |                                                           |                           | NP_851931.1 | RNA-binding tegument protein interacting with PKR         | Immune system modulation  |                              |                                           |                           |
|                |                                                           |                           |             |                                                           |                           |                              | Genes of unknown function: 0              |                           |
|                |                                                           |                           |             | <i>Human herpesvirus 2</i>                                | NC_001798.1               | NP_044469.1                  | Trans-acting transcriptional protein ICP0 | DNA/RNA processing        |
|                |                                                           |                           |             |                                                           |                           | NP_044483.1                  | Minor tegument protein                    | Viral particle associated |
| NP_044493.1    | Nonglycosylated membrane-associated protein               | Viral particle associated |             |                                                           |                           |                              |                                           |                           |
| NP_044495.1    | Capsid maturation protease                                | Viral particle formation  |             |                                                           |                           |                              |                                           |                           |
| NP_044496.1    | Capsid maturation protease                                | Viral particle formation  |             |                                                           |                           |                              |                                           |                           |
| NP_044515.1    | Tegument/envelope protein                                 | Viral particle associated |             |                                                           |                           |                              |                                           |                           |
| NP_044522.1    | Capsid/tegument-associated phosphoprotein                 | Viral particle associated |             |                                                           |                           |                              |                                           |                           |
| NP_044525.1    | Immediate-early protein ICP27 (transcriptional activator) | DNA/RNA processing        |             |                                                           |                           |                              |                                           |                           |
| NP_044526.1    | Nuclear matrix-associated protein                         | Viral particle formation  |             |                                                           |                           |                              |                                           |                           |
| NP_044528.1    | Trans-acting transcriptional protein ICP0                 | DNA/RNA processing        |             |                                                           |                           |                              |                                           |                           |
| NP_044534.1    | Virion glycoprotein G                                     | Viral particle associated |             |                                                           |                           |                              |                                           |                           |
| NP_044537.1    | Virion glycoprotein I                                     | Viral particle associated |             |                                                           |                           |                              |                                           |                           |
| NP_044538.1    | Virion glycoprotein E                                     | Viral particle associated |             |                                                           |                           |                              |                                           |                           |
| NP_044542.1    | Virion protein (RNA-binding)                              | Viral particle associated |             |                                                           |                           |                              |                                           |                           |
|                |                                                           |                           |             |                                                           |                           | Genes of unknown function: 7 |                                           |                           |
|                | <i>Human herpesvirus 1</i>                                | NC_001806.1               | NP_044600.1 | Neurovirulence factor (ICP34.5)                           | DNA/RNA processing        |                              |                                           |                           |
|                |                                                           |                           | NP_044601.1 | Trans-acting transcriptional protein ICP0                 | DNA/RNA processing        |                              |                                           |                           |
|                |                                                           |                           | NP_044602.1 | Virion glycoprotein L                                     | Viral particle associated |                              |                                           |                           |
|                |                                                           |                           | NP_044603.1 | Uracil-DNA glycosylase                                    | DNA/RNA processing        |                              |                                           |                           |
|                |                                                           |                           | NP_044604.1 | Nuclear phosphoprotein UL3                                | Poorly characterized      |                              |                                           |                           |
|                |                                                           |                           | NP_044627.1 | Capsid maturation protease                                | Viral particle formation  |                              |                                           |                           |
|                |                                                           |                           | NP_044628.1 | Capsid maturation protease                                | Viral particle formation  |                              |                                           |                           |
|                |                                                           |                           | NP_044636.1 | Virion associated phosphoprotein                          | Viral particle associated |                              |                                           |                           |
|                |                                                           |                           | NP_044647.1 | Tegument/envelope protein                                 | Viral particle associated |                              |                                           |                           |
|                |                                                           |                           | NP_044651.1 | Tegument protein                                          | Viral particle associated |                              |                                           |                           |
|                |                                                           |                           | NP_044657.1 | Immediate early protein                                   | Poorly characterized      |                              |                                           |                           |
|                |                                                           |                           | NP_044659.1 | Type II membrane protein UL56                             | Poorly characterized      |                              |                                           |                           |

| Classification | Species                                           | Genome ID                 | Protein ID                    | Annotation                                                      | Functional Category       |
|----------------|---------------------------------------------------|---------------------------|-------------------------------|-----------------------------------------------------------------|---------------------------|
|                | <i>Human herpesvirus 1</i>                        |                           | NP_044660.1                   | Trans-acting transcriptional protein ICP0                       | DNA/RNA processing        |
|                |                                                   |                           | NP_044661.1                   | Neurovirulence factor (ICP34.5)                                 | DNA/RNA processing        |
|                |                                                   |                           | NP_044663.1                   | Immediate early protein ICP22                                   | DNA/RNA processing        |
|                |                                                   |                           | NP_044666.1                   | Virion glycoprotein G                                           | Viral particle associated |
|                |                                                   |                           | NP_044670.1                   | Virion glycoprotein E                                           | Viral particle associated |
|                |                                                   |                           | NP_044671.1                   | Nucleolar phosphoprotein                                        | Poorly characterized      |
|                |                                                   |                           | NP_044673.1                   | Virion protein                                                  | Viral particle associated |
|                |                                                   |                           | NP_044674.1                   | Virion protein (RNA-binding)                                    | Viral particle associated |
|                |                                                   |                           |                               | Genes of unknown function: 4                                    |                           |
|                | <i>Psittacid herpesvirus 1</i>                    | NC_005264.1               | NP_944388.1                   | Membrane protein                                                | Poorly characterized      |
|                |                                                   |                           | NP_944398.1                   | Capsid maturation protease                                      | Viral particle formation  |
|                |                                                   |                           | NP_944449.1                   | glycoprotein I                                                  | Poorly characterized      |
|                |                                                   |                           |                               | Genes of unknown function: 5                                    |                           |
|                | <i>Gallid herpesvirus 2</i>                       | NC_002229.2               | NP_057741.1                   | Arg-rich protein                                                | Poorly characterized      |
|                |                                                   |                           | NP_057748.1                   | PCNB like protein                                               | Poorly characterized      |
|                |                                                   |                           | NP_057828.1                   | Marek's disease gammaherpesvirus tumorigenicity associated mRNA | Poorly characterized      |
|                |                                                   |                           | NP_057749.1                   | Marek's disease gammaherpesvirus tumorigenicity associated mRNA | Poorly characterized      |
|                |                                                   |                           | NP_057829.1                   | PCNB like protein                                               | Poorly characterized      |
|                |                                                   |                           | NP_057836.1                   | Arg-rich protein                                                | Poorly characterized      |
|                |                                                   |                           |                               | Genes of unknown function: 13                                   |                           |
|                | <i>Gallid herpesvirus 3</i>                       | NC_002577.1               | Genes of unknown function: 19 |                                                                 |                           |
|                | <i>Cercopithecine herpesvirus 2</i>               | NC_006560.1               | YP_164442.1                   | Trans-acting transcriptional protein ICP0                       | DNA/RNA processing        |
|                |                                                   |                           | YP_164443.1                   | Virion glycoprotein L                                           | Viral particle associated |
|                |                                                   |                           | YP_164444.1                   | Uracil-DNA glycosylase                                          | DNA/RNA processing        |
|                |                                                   |                           | YP_164455.1                   | Virion protein kinase                                           | Viral particle associated |
|                |                                                   |                           | YP_164456.1                   | Minor tegument protein                                          | Viral particle associated |
|                |                                                   |                           | YP_164466.1                   | Nonglycosylated virion membrane-associated protein              | Viral particle associated |
|                |                                                   |                           | YP_164469.1                   | Scaffolding protein                                             | Viral particle formation  |
|                |                                                   |                           | YP_164479.1                   | Very large tegument protein                                     | Viral particle associated |
|                |                                                   |                           | YP_164480.1                   | Minor tegument protein                                          | Viral particle associated |
|                |                                                   |                           | YP_164492.1                   | Major tegument protein VP22                                     | Viral particle associated |
|                |                                                   |                           | YP_164494.1                   | dUTPase                                                         | Nucleotide metabolism     |
|                |                                                   |                           | YP_164495.1                   | Capsid/tegument-associated phosphoprotein                       | Viral particle associated |
|                |                                                   |                           | YP_164498.1                   | Immediate-early protein ICP27 (transcriptional activator)       | DNA/RNA processing        |
|                |                                                   |                           | YP_164500.1                   | Type II membrane protein                                        | Poorly characterized      |
|                |                                                   |                           | YP_164501.1                   | Trans-acting transcriptional protein ICP0                       | DNA/RNA processing        |
|                |                                                   |                           | YP_164503.1                   | Immediate-early protein ICP22                                   | DNA/RNA processing        |
|                |                                                   |                           | YP_164504.1                   | Tegument protein                                                | Viral particle associated |
|                |                                                   |                           | YP_164506.1                   | Virion glycoprotein G, involved in entry into polarized cells   | Entry and exit            |
|                |                                                   |                           | YP_164509.1                   | Virion glycoprotein I                                           | Viral particle associated |
|                |                                                   |                           | YP_164510.1                   | Virion glycoprotein E                                           | Viral particle associated |
| YP_164513.1    | Tegument protein                                  | Viral particle associated |                               |                                                                 |                           |
| YP_164514.1    | RNA-binding tegument protein interacting with PKR | Immune system modulation  |                               |                                                                 |                           |
|                |                                                   |                           |                               | Genes of unknown function: 0                                    |                           |
|                | <i>Meleagrid herpesvirus 1</i>                    | NC_002641.1               | Genes of unknown function: 8  |                                                                 |                           |

| Classification         | Species                                                                                            | Genome ID                     | Protein ID  | Annotation                                                                                | Functional Category       |
|------------------------|----------------------------------------------------------------------------------------------------|-------------------------------|-------------|-------------------------------------------------------------------------------------------|---------------------------|
| <i>Betaherpesvirus</i> | <i>Pongine herpesvirus 4</i>                                                                       | NC_003521.1                   | NP_612644.1 | Virion glycoprotein RL10                                                                  | Viral particle associated |
|                        |                                                                                                    |                               | NP_612645.1 | IgG Fc-binding glycoprotein RL11                                                          | Immune system modulation  |
|                        |                                                                                                    |                               | NP_612646.1 | Glycoprotein RL12                                                                         | Poorly characterized      |
|                        |                                                                                                    |                               | NP_612647.1 | Glycoprotein TR13                                                                         | Poorly characterized      |
|                        |                                                                                                    |                               | NP_612651.1 | Glycoprotein UL6                                                                          | Poorly characterized      |
|                        |                                                                                                    |                               | NP_612652.1 | Glycoprotein UL7                                                                          | Poorly characterized      |
|                        |                                                                                                    |                               | NP_612653.1 | Glycoprotein UL8                                                                          | Poorly characterized      |
|                        |                                                                                                    |                               | NP_612654.1 | Glycoprotein UL9                                                                          | Poorly characterized      |
|                        |                                                                                                    |                               | NP_612655.1 | Glycoprotein UL10                                                                         | Poorly characterized      |
|                        |                                                                                                    |                               | NP_612656.1 | Glycoprotein UL11                                                                         | Poorly characterized      |
|                        |                                                                                                    |                               | NP_612662.1 | MHC class I-like protein UL18                                                             | Immune system modulation  |
|                        |                                                                                                    |                               | NP_612664.1 | Glycoprotein UL20                                                                         | Poorly characterized      |
|                        |                                                                                                    |                               | NP_612666.1 | Glycoprotein UL22A                                                                        | Poorly characterized      |
|                        |                                                                                                    |                               | NP_612676.1 | pp150 tegument protein UL3                                                                | Viral particle associated |
|                        |                                                                                                    |                               | NP_612681.1 | Viral mitochondrial inhibitor of apoptosis (vMIA)                                         | Immune system modulation  |
|                        |                                                                                                    |                               | NP_612694.1 | Membrane-associated protein UL50 involved in egress of capsids from nucleus               | Entry and exit            |
|                        |                                                                                                    |                               | NP_612695.1 | DNA packaging protein UL51                                                                | Viral particle formation  |
|                        |                                                                                                    |                               | NP_612706.1 | Envelope glycoprotein UL73                                                                | Viral particle associated |
|                        |                                                                                                    |                               | NP_612707.1 | Glycoprotein UL74                                                                         | Poorly characterized      |
|                        |                                                                                                    |                               | NP_612721.1 | Virion protein UL88                                                                       | Viral particle associated |
|                        |                                                                                                    |                               | NP_612727.1 | Tegument protein UL95                                                                     | Viral particle associated |
|                        |                                                                                                    |                               | NP_612731.1 | Myristylated tegument protein UL99                                                        | Viral particle associated |
|                        |                                                                                                    |                               | NP_612737.1 | UL112 involved in recruiting DNA replication proteins to nuclear replication compartments | DNA/RNA processing        |
|                        |                                                                                                    |                               | NP_612743.1 | Glycoprotein UL120                                                                        | Poorly characterized      |
|                        |                                                                                                    |                               | NP_612744.1 | Membrane protein UL121                                                                    | Poorly characterized      |
|                        |                                                                                                    |                               | NP_612745.1 | Immediate-early transcriptional regulator UL122                                           | DNA/RNA processing        |
|                        |                                                                                                    |                               | NP_612746.1 | Immediate-early transcriptional regulator UL123                                           | DNA/RNA processing        |
|                        |                                                                                                    |                               | NP_612747.1 | Glycoprotein UL124                                                                        | Poorly characterized      |
|                        |                                                                                                    |                               | NP_612754.1 | Putative CXC chemokine UL147                                                              | Immune system modulation  |
|                        |                                                                                                    |                               | NP_612755.1 | Putative CXC chemokine UL146A                                                             | Immune system modulation  |
|                        |                                                                                                    |                               | NP_612756.1 | Putative CXC chemokine UL146                                                              | Immune system modulation  |
|                        |                                                                                                    |                               | NP_612758.1 | Glycoprotein UL144 similar to TNFR                                                        | Immune system modulation  |
|                        |                                                                                                    |                               | NP_612759.1 | MHC class I                                                                               | Immune system modulation  |
|                        |                                                                                                    |                               | NP_612762.1 | Glycoprotein UL139                                                                        | Poorly characterized      |
|                        |                                                                                                    |                               | NP_612775.1 | Transcriptional transactivator IRS1                                                       | DNA/RNA processing        |
| NP_612780.1            | Glycoprotein US7                                                                                   | Poorly characterized          |             |                                                                                           |                           |
| NP_612782.1            | Glycoprotein US9                                                                                   | Poorly characterized          |             |                                                                                           |                           |
| NP_612783.1            | Glycoprotein US10                                                                                  | Poorly characterized          |             |                                                                                           |                           |
| NP_612784.1            | Glycoprotein US11 targeting MHC class I molecules for proteasome-dependent degradation; US6 family | Immune system modulation      |             |                                                                                           |                           |
| NP_612799.1            | Chemokine receptor homologue                                                                       | Immune system modulation      |             |                                                                                           |                           |
| NP_612807.1            | Transcriptional transactivator TRS1                                                                | DNA/RNA processing            |             |                                                                                           |                           |
|                        |                                                                                                    | Genes of unknown function: 26 |             |                                                                                           |                           |
| <i>Betaherpesvirus</i> | <i>Human herpesvirus 6B</i>                                                                        | NC_000898.1                   | NP_597817.1 | G-protein coupled receptor homolog                                                        | Immune system modulation  |
|                        |                                                                                                    |                               | NP_050262.1 | Chemokine                                                                                 | Immune system modulation  |
|                        |                                                                                                    |                               | NP_050264.1 | OX-2 homolog                                                                              | Immune system modulation  |
|                        |                                                                                                    |                               |             | Genes of unknown function: 3                                                              |                           |

| Classification | Species                                 | Genome ID   | Protein ID  | Annotation                                                             | Functional Category       |                               |                               |                           |
|----------------|-----------------------------------------|-------------|-------------|------------------------------------------------------------------------|---------------------------|-------------------------------|-------------------------------|---------------------------|
|                | <i>Murid herpesvirus 1</i>              | NC_004065.1 | YP_214012.1 | Glycoprotein family m02                                                | Poorly characterized      |                               |                               |                           |
|                |                                         |             | YP_214013.1 | Glycoprotein family m02                                                | Poorly characterized      |                               |                               |                           |
|                |                                         |             | YP_214016.1 | Glycoprotein family m02                                                | Poorly characterized      |                               |                               |                           |
|                |                                         |             | YP_214017.1 | Glycoprotein family m02                                                | Poorly characterized      |                               |                               |                           |
|                |                                         |             | YP_214018.1 | Glycoprotein family m02                                                | Poorly characterized      |                               |                               |                           |
|                |                                         |             | YP_214019.1 | Glycoprotein family m02                                                | Poorly characterized      |                               |                               |                           |
|                |                                         |             | YP_214020.1 | Glycoprotein family m02                                                | Poorly characterized      |                               |                               |                           |
|                |                                         |             | YP_214021.1 | Glycoprotein family m02                                                | Poorly characterized      |                               |                               |                           |
|                |                                         |             | YP_214022.1 | Glycoprotein family m02                                                | Poorly characterized      |                               |                               |                           |
|                |                                         |             | YP_214023.1 | Glycoprotein family m02                                                | Poorly characterized      |                               |                               |                           |
|                |                                         |             | YP_214024.1 | Glycoprotein family m02                                                | Poorly characterized      |                               |                               |                           |
|                |                                         |             | YP_214111.1 | Serine-alanine-rich glycoprotein                                       | Poorly characterized      |                               |                               |                           |
|                |                                         |             |             |                                                                        |                           |                               | Genes of unknown function: 40 |                           |
|                | <i>Human herpesvirus 5 strain AD169</i> | NC_001347.2 | NP_899637.1 | IgG Fc-binding glycoprotein RL11                                       | Immune system modulation  |                               |                               |                           |
|                |                                         |             | NP_899638.1 | IgG Fc-binding glycoprotein RL12                                       | Immune system modulation  |                               |                               |                           |
|                |                                         |             | NP_039943.1 | Membrane protein precursor                                             | Poorly characterized      |                               |                               |                           |
|                |                                         |             | NP_039945.1 | Membrane protein precursor                                             | Poorly characterized      |                               |                               |                           |
|                |                                         |             | NP_039952.1 | MHC class I antigen                                                    | Immune system modulation  |                               |                               |                           |
|                |                                         |             | NP_783776.1 | Secreted glycoprotein                                                  | Poorly characterized      |                               |                               |                           |
|                |                                         |             | NP_039971.1 | Viral mitochondrial inhibitor of apoptosis (vMIA)                      | Immune system modulation  |                               |                               |                           |
|                |                                         |             | NP_039984.1 | Membrane-associated protein involved in egress of capsids from nucleus | Entry and exit            |                               |                               |                           |
|                |                                         |             | NP_040007.1 | Envelope glycoprotein UL73                                             | Viral particle associated |                               |                               |                           |
|                |                                         |             | NP_040008.1 | Glycoprotein UL7                                                       | Poorly characterized      |                               |                               |                           |
|                |                                         |             | NP_040050.1 | Early phosphoprotein                                                   | Poorly characterized      |                               |                               |                           |
|                |                                         |             | NP_040058.1 | Membrane protein UL121                                                 | Poorly characterized      |                               |                               |                           |
|                |                                         |             | NP_040060.1 | Major immediate-early protein                                          | Poorly characterized      |                               |                               |                           |
|                |                                         |             | NP_040061.1 | Glycoprotein UL124                                                     | Poorly characterized      |                               |                               |                           |
|                |                                         |             | NP_040067.1 | Putative secreted protein                                              | Poorly characterized      |                               |                               |                           |
|                |                                         |             | NP_899641.1 | Glycoprotein RL1                                                       | Poorly characterized      |                               |                               |                           |
|                |                                         |             | NP_899642.1 | IgG Fc-binding glycoprotein RL11                                       | Immune system modulation  |                               |                               |                           |
|                |                                         |             | NP_040085.1 | Transcriptional transactivator IRS1                                    | DNA/RNA processing        |                               |                               |                           |
|                |                                         |             | NP_040088.1 | Immediate-early glycoprotein US3                                       | Poorly characterized      |                               |                               |                           |
|                |                                         |             | NP_040091.1 | Glycoprotein US6                                                       | Poorly characterized      |                               |                               |                           |
|                |                                         |             | NP_040092.1 | Glycoprotein US7                                                       | Poorly characterized      |                               |                               |                           |
|                |                                         |             | NP_040094.1 | Glycoprotein US9                                                       | Poorly characterized      |                               |                               |                           |
|                |                                         |             | NP_040095.1 | Glycoprotein US10                                                      | Poorly characterized      |                               |                               |                           |
|                |                                         |             | NP_040096.1 | Glycoprotein US11                                                      | Poorly characterized      |                               |                               |                           |
|                |                                         |             |             |                                                                        |                           |                               | Genes of unknown function: 29 |                           |
|                |                                         |             |             | <i>Human herpesvirus 6</i>                                             | NC_001664.1               | Genes of unknown function: 11 |                               |                           |
|                |                                         |             |             | <i>Human herpesvirus 7</i>                                             | NC_001716.2               | YP_073787.1                   | Envelope glycoprotein U47     | Viral particle associated |
|                |                                         |             |             |                                                                        |                           | YP_073812.1                   | Envelope glycoprotein M       | Viral particle associated |
|                |                                         |             |             |                                                                        |                           | Genes of unknown function: 6  |                               |                           |
|                | <i>Cercopithecine herpesvirus 8</i>     | NC_006150.1 | YP_068195.1 | Envelope glycoprotein                                                  | Viral particle associated |                               |                               |                           |
|                |                                         |             |             | Genes of unknown function: 79                                          |                           |                               |                               |                           |



| Classification                | Species                                                                                   | Genome ID                 | Protein ID                    | Annotation                               | Functional Category       |             |                                  |
|-------------------------------|-------------------------------------------------------------------------------------------|---------------------------|-------------------------------|------------------------------------------|---------------------------|-------------|----------------------------------|
|                               | <i>Murid herpesvirus 2</i>                                                                | NC_002512.2               | NP_064173.1                   | Putative membrane protein                | Poorly characterized      |             |                                  |
|                               |                                                                                           |                           | NP_064217.1                   | Glycoprotein L precursor                 | Poorly characterized      |             |                                  |
|                               |                                                                                           |                           | NP_064218.1                   | Mucin (Fragment)                         | Poorly characterized      |             |                                  |
|                               |                                                                                           |                           | NP_064229.1                   | Large tegument protein                   | Viral particle associated |             |                                  |
|                               |                                                                                           |                           | NP_064238.1                   | Nonstructural protein NS                 | Poorly characterized      |             |                                  |
|                               |                                                                                           |                           | NP_064239.1                   | Immediate-early protein 2 (IE2)          | Poorly characterized      |             |                                  |
|                               |                                                                                           |                           | NP_064240.1                   | CC chemokine homolog                     | Immune system modulation  |             |                                  |
|                               |                                                                                           |                           | NP_064247.1                   | Tegument protein                         | Viral particle associated |             |                                  |
|                               |                                                                                           |                           | NP_064248.1                   | Tegument protein                         | Viral particle associated |             |                                  |
|                               |                                                                                           |                           | NP_064249.1                   | Tegument protein                         | Viral particle associated |             |                                  |
|                               |                                                                                           |                           | NP_064251.1                   | MHC class Ib antigen                     | Immune system modulation  |             |                                  |
|                               |                                                                                           |                           | Genes of unknown function: 76 |                                          |                           |             |                                  |
|                               |                                                                                           |                           |                               | <i>Human herpesvirus 5 strain Merlin</i> | NC_006273.1               | YP_081459.1 | IgG Fc-binding glycoprotein RL11 |
| YP_081460.1                   | IgG Fc-binding glycoprotein RL12                                                          | Immune system modulation  |                               |                                          |                           |             |                                  |
| YP_081461.1                   | Glycoprotein RL11 family member                                                           | Poorly characterized      |                               |                                          |                           |             |                                  |
| YP_081462.1                   | Glycoprotein RL11 family member                                                           | Poorly characterized      |                               |                                          |                           |             |                                  |
| YP_081466.1                   | Glycoprotein RL11 family member                                                           | Poorly characterized      |                               |                                          |                           |             |                                  |
| YP_081467.1                   | Glycoprotein RL11 family member                                                           | Poorly characterized      |                               |                                          |                           |             |                                  |
| YP_081468.1                   | Glycoprotein RL11 family member                                                           | Poorly characterized      |                               |                                          |                           |             |                                  |
| YP_081469.1                   | Glycoprotein RL11 family member                                                           | Poorly characterized      |                               |                                          |                           |             |                                  |
| YP_081470.1                   | Glycoprotein RL11 family member                                                           | Poorly characterized      |                               |                                          |                           |             |                                  |
| YP_081471.1                   | Glycoprotein RL11 family member                                                           | Poorly characterized      |                               |                                          |                           |             |                                  |
| YP_081477.1                   | MHC class I-like protein UL18                                                             | Immune system modulation  |                               |                                          |                           |             |                                  |
| YP_081479.1                   | Glycoprotein RL11 family member                                                           | Poorly characterized      |                               |                                          |                           |             |                                  |
| YP_081481.1                   | Glycoprotein                                                                              | Poorly characterized      |                               |                                          |                           |             |                                  |
| YP_081496.1                   | Viral mitochondrial inhibitor of apoptosis (vMIA)                                         | Immune system modulation  |                               |                                          |                           |             |                                  |
| YP_081509.1                   | Membrane-associated protein involved in egress of capsids from nucleus                    | Entry and exit            |                               |                                          |                           |             |                                  |
| YP_081521.1                   | Envelope glycoprotein UL73                                                                | Viral particle associated |                               |                                          |                           |             |                                  |
| YP_081522.1                   | Glycoprotein O                                                                            | Poorly characterized      |                               |                                          |                           |             |                                  |
| YP_081529.1                   | Protease and minor capsid scaffold protein UL80                                           | Viral particle formation  |                               |                                          |                           |             |                                  |
| YP_081542.1                   | Tegument protein UL95                                                                     | Viral particle associated |                               |                                          |                           |             |                                  |
| YP_081553.1                   | UL112 involved in recruiting DNA replication proteins to nuclear replication compartments | DNA/RNA processing        |                               |                                          |                           |             |                                  |
| YP_081559.1                   | Glycoprotein                                                                              | Poorly characterized      |                               |                                          |                           |             |                                  |
| YP_081560.1                   | Membrane protein                                                                          | Poorly characterized      |                               |                                          |                           |             |                                  |
| YP_081562.1                   | Immediate-early transcriptional regulator UL123                                           | DNA/RNA processing        |                               |                                          |                           |             |                                  |
| YP_081563.1                   | Glycoprotein                                                                              | Poorly characterized      |                               |                                          |                           |             |                                  |
| YP_081565.1                   | Putative secreted protein                                                                 | Poorly characterized      |                               |                                          |                           |             |                                  |
| YP_081570.1                   | Putative CXC chemokine UL147                                                              | Immune system modulation  |                               |                                          |                           |             |                                  |
| YP_081571.1                   | Alpha-chemokine; UL146 family member                                                      | Immune system modulation  |                               |                                          |                           |             |                                  |
| YP_081573.1                   | Glycoprotein similar to TNFR                                                              | Immune system modulation  |                               |                                          |                           |             |                                  |
| YP_081574.1                   | Similar to MHC class I; UL18 family member                                                | Immune system modulation  |                               |                                          |                           |             |                                  |
| YP_081577.1                   | Glycoprotein                                                                              | Poorly characterized      |                               |                                          |                           |             |                                  |
| YP_081587.1                   | Transcriptional transactivator IRS1                                                       | DNA/RNA processing        |                               |                                          |                           |             |                                  |
| YP_081590.1                   | Immediate-early glycoprotein US3                                                          | Poorly characterized      |                               |                                          |                           |             |                                  |
| YP_081591.1                   | Glycoprotein; US6 family member                                                           | Poorly characterized      |                               |                                          |                           |             |                                  |
| YP_081592.1                   | Glycoprotein; US6 family member                                                           | Poorly characterized      |                               |                                          |                           |             |                                  |
| YP_081594.1                   | Glycoprotein; role in cell-to-cell spread in epithelial cells; US6 family member          | Poorly characterized      |                               |                                          |                           |             |                                  |
| YP_081595.1                   | Glycoprotein; US6 family member                                                           | Poorly characterized      |                               |                                          |                           |             |                                  |
| Genes of unknown function: 20 |                                                                                           |                           |                               |                                          |                           |             |                                  |

| Classification          | Species                              | Genome ID   | Protein ID  | Annotation                                                                       | Functional Category       |
|-------------------------|--------------------------------------|-------------|-------------|----------------------------------------------------------------------------------|---------------------------|
|                         | <i>Tupaia herpesvirus 1</i>          | NC_002794.1 | NP_116415.1 | Genes of unknown function: 59                                                    |                           |
| <b>Gammaherpesvirus</b> | <i>Human herpesvirus 4</i>           | NC_007605.1 | YP_401631.1 | Latent membrane protein 2 (Terminal protein)                                     | Immune system modulation  |
|                         |                                      |             | YP_401632.1 | Latent membrane protein 2 (Terminal protein)                                     | Immune system modulation  |
|                         |                                      |             | YP_401634.1 | Viral interleukin-10 homolog precursor (vIL-10)                                  | Immune system modulation  |
|                         |                                      |             | YP_401644.1 | Epstein-Barr nuclear antigen 2 (EBV nuclear antigen 2) (EBNA-2)                  | Poorly characterized      |
|                         |                                      |             | YP_401646.1 | Early antigen protein R (EA-R) (Nuclear antigen)Bcl-2 homolog (BHRF1)            | Immune system modulation  |
|                         |                                      |             | YP_401667.1 | BLLF1 envelope glycoprotein                                                      | Entry and exit            |
|                         |                                      |             | YP_401669.1 | Epstein-Barr nuclear antigen 3 (EBNA-3A), function in nucleotide salvage pathway | Nucleotide metabolism     |
|                         |                                      |             | YP_401670.1 | Epstein-Barr nuclear antigen (EBNA-3B)                                           | DNA/RNA processing        |
|                         |                                      |             | YP_401671.1 | Epstein-Barr nuclear antigen (EBNA-3C)                                           | DNA/RNA processing        |
|                         |                                      |             | YP_401673.1 | Trans-activator protein BZLF1 (EB; Zebra)                                        | DNA/RNA processing        |
|                         |                                      |             | YP_401677.1 | Epstein-Barr nuclear antigen 1 (EBNA-1)                                          | DNA/RNA processing        |
|                         |                                      |             | YP_401706.1 | Membrane glycoprotein                                                            | Poorly characterized      |
|                         |                                      |             | YP_401709.1 | dUTPase                                                                          | Nucleotide metabolism     |
|                         |                                      |             | YP_401722.1 | Latent membrane protein 1 (LMP-1) (Protein p63)                                  | Immune system modulation  |
|                         |                                      |             |             | Genes of unknown function: 23                                                    |                           |
|                         | <i>Equid herpesvirus 2</i>           | NC_001650.1 | NP_042597.1 | C-C chemokine receptor type 3                                                    | Immune system modulation  |
|                         |                                      |             | NP_042604.1 | Glycoprotein B                                                                   | Poorly characterized      |
|                         |                                      |             | NP_042618.1 | Glycoprotein H                                                                   | Poorly characterized      |
|                         |                                      |             | NP_042628.1 | Viral DNA cleavage/packaging protein                                             | Viral particle formation  |
|                         |                                      |             | NP_042633.1 | Probable serine/threonine-protein kinase                                         | Poorly characterized      |
|                         |                                      |             | NP_042643.1 | Uracil-DNA glycosylase                                                           | DNA/RNA processing        |
|                         |                                      |             | NP_042644.1 | Glycoprotein L precursor                                                         | Poorly characterized      |
|                         |                                      |             | NP_042645.1 | Glycoprotein L                                                                   | Poorly characterized      |
|                         |                                      |             | NP_042654.1 | Post-transcriptional transactivator                                              | DNA/RNA processing        |
|                         |                                      |             | NP_042661.1 | Tegument protein                                                                 | Viral particle associated |
|                         |                                      |             | NP_042662.1 | Capsid protein                                                                   | Viral particle associated |
|                         |                                      |             | NP_042670.1 | G protein-coupled receptor                                                       | Immune system modulation  |
|                         |                                      |             | NP_042674.1 | Probable C-C chemokine receptor type 3                                           | Immune system modulation  |
|                         |                                      |             | NP_042675.1 | Probable C-C chemokine receptor type 3                                           | Immune system modulation  |
|                         |                                      |             |             | Genes of unknown function: 14                                                    |                           |
|                         | <i>Cercopithecine herpesvirus 15</i> | NC_006146.1 | YP_067938.1 | Terminal protein LMP2A                                                           | Immune system modulation  |
|                         |                                      |             | YP_067939.1 | Terminal protein LMP2A                                                           | Immune system modulation  |
|                         |                                      |             | YP_067944.1 | Bcl-2 homolog (BHRF1)                                                            | Immune system modulation  |
|                         |                                      |             | YP_067963.1 | gp350 envelope glycoprotein                                                      | Entry and exit            |
|                         |                                      |             | YP_067965.1 | Epstein-Barr nuclear antigen 3 (EBNA-3A), function in nucleotide salvage pathway | Nucleotide metabolism     |
|                         |                                      |             | YP_067966.1 | Nuclear antigen 3B (EBNA-3B)                                                     | DNA/RNA processing        |
|                         |                                      |             | YP_067967.1 | Nuclear antigen 3C (EBNA-3C)                                                     | DNA/RNA processing        |
|                         |                                      |             | YP_067969.1 | Trans-activator protein BZLF1                                                    | DNA/RNA processing        |
|                         |                                      |             | YP_067973.1 | Nuclear antigen EBNA-1                                                           | DNA/RNA processing        |
|                         |                                      |             | YP_067991.1 | Putative membrane antigen gp85                                                   | Poorly characterized      |
|                         |                                      |             | YP_068002.1 | Probable membrane glycoprotein                                                   | Poorly characterized      |
|                         |                                      |             | YP_068017.1 | Latent membrane protein 1 (LMP-1)                                                | Immune system modulation  |
|                         |                                      |             |             | Genes of unknown function: 10                                                    |                           |

| Classification                   | Species                          | Genome ID   | Protein ID  | Annotation                                                  | Functional Category                                         |                           |
|----------------------------------|----------------------------------|-------------|-------------|-------------------------------------------------------------|-------------------------------------------------------------|---------------------------|
| <i>Unclassified herpesvirus</i>  | <i>Ostreid herpesvirus 1</i>     | NC_005881.1 | YP_024582.1 | RING finger protein                                         | Poorly characterized                                        |                           |
|                                  |                                  |             | YP_024600.1 | Hypothetical protein (Mid-1-related chloride channel 1)     | Poorly characterized                                        |                           |
|                                  |                                  |             | YP_024619.1 | Membrane protein                                            | Poorly characterized                                        |                           |
|                                  |                                  |             |             | Genes of unknown function: 4                                |                                                             |                           |
| <i>Caudovirales</i>              | <i>Enterobacteria phage RB43</i> | NC_007023.1 | YP_239022.1 | gp59, loader of gene 41 DNA helicase                        | DNA/RNA processing                                          |                           |
|                                  |                                  |             | YP_239162.1 | MutT (NUDIX) domain                                         | DNA/RNA processing                                          |                           |
|                                  |                                  |             | YP_239174.1 | dNMP kinase                                                 | Nucleotide metabolism                                       |                           |
|                                  |                                  |             | YP_239192.1 | MobE mobile endonuclease                                    | Mobile elements                                             |                           |
|                                  |                                  |             | YP_239258.1 | gp38 distal long tail fiber assembly catalyst               | Viral particle formation                                    |                           |
|                                  |                                  |             | YP_239259.1 | t holin                                                     | Entry and exit                                              |                           |
|                                  |                                  |             |             |                                                             | Genes of unknown function: 9                                |                           |
|                                  | <i>Enterobacteria phage T4</i>   | NC_000866.4 | NP_049856.1 | NP_049856.1                                                 | gp59, loader of gene 41 DNA helicase                        | DNA/RNA processing        |
|                                  |                                  |             |             | NP_049861.1                                                 | gp35 hinge connector of long tail fiber, proximal connector | Viral particle associated |
|                                  |                                  |             |             | NP_049865.1                                                 | t holin lysis mediator                                      | Entry and exit            |
|                                  |                                  |             |             | NP_049887.1                                                 | DenB DNA endonuclease                                       | DNA/RNA processing        |
|                                  |                                  |             |             |                                                             | Genes of unknown function: 4                                |                           |
|                                  | <i>Pseudomonas phage phiEL</i>   | NC_007623.1 | YP_418058.1 | YP_418070.1                                                 | HNH endonuclease                                            | Mobile elements           |
|                                  |                                  |             |             | YP_418070.1                                                 | Putative transposase                                        | Mobile elements           |
|                                  |                                  |             |             | YP_418185.1                                                 | Putative acetyltransferase                                  | Other metabolism          |
|                                  |                                  |             |             |                                                             | Genes of unknown function: 15                               |                           |
|                                  | <i>Pseudomonas phage phiKZ</i>   | NC_004629.1 | NP_803862.1 | HNH endonuclease                                            | Mobile elements                                             | Mobile elements           |
|                                  |                                  |             |             |                                                             | Genes of unknown function: 26                               |                           |
|                                  | <i>Mycobacterium phage Bxz1</i>  | NC_004687.1 | NP_818246.1 | Putative DNA primase                                        | DNA/RNA processing                                          | DNA/RNA processing        |
|                                  |                                  |             |             | Genes of unknown function: 26                               |                                                             |                           |
| <i>Enterobacteria phage RB69</i> | NC_004928.1                      | NP_861748.1 | NP_861804.1 | gp62 clamp loader subunit, DNA polymerase accessory protein | DNA/RNA processing                                          |                           |
|                                  |                                  |             | NP_861804.1 | Valyl-tRNA synthetase modifier                              | Translation and protein metabolism                          |                           |
|                                  |                                  |             | NP_861937.1 | gp59, loader of gp41 DNA helicase                           | DNA/RNA processing                                          |                           |
|                                  |                                  |             | NP_861942.1 | gp35 hinge connector of long tail fiber, proximal connector | Viral particle associated                                   |                           |
|                                  |                                  |             | NP_861946.1 | t holin lysis mediator                                      | Entry and exit                                              |                           |
|                                  |                                  |             |             | Genes of unknown function: 6                                |                                                             |                           |
| <i>Enterobacteria phage RB49</i> | NC_005066.1                      |             |             | Genes of unknown function: 12                               |                                                             |                           |
| <i>Vibrio phage KVP40</i>        | NC_005083.1                      | NP_899252.1 | NP_899254.1 | gp59, loader of gp41 DNA helicase                           | DNA/RNA processing                                          |                           |
|                                  |                                  |             | NP_899254.1 | Dihydrofolate reductase                                     | Nucleotide metabolism                                       |                           |
|                                  |                                  |             |             | Genes of unknown function: 16                               |                                                             |                           |
| <i>Aeromonas phage 44RR2.8t</i>  | NC_005135.1                      | NP_932385.1 | NP_932560.1 | DNA replication primase                                     | DNA/RNA processing                                          |                           |
|                                  |                                  |             | NP_932560.1 | Endonuclease II                                             | DNA/RNA processing                                          |                           |
|                                  |                                  |             | NP_932562.1 | Dihydrofolate reductase                                     | Nucleotide metabolism                                       |                           |
|                                  |                                  |             |             | Genes of unknown function: 4                                |                                                             |                           |
| <i>Aeromonas phage Aehl</i>      | NC_005260.1                      | NP_943926.1 | NP_944074.1 | MobE homing endonuclease                                    | Mobile elements                                             |                           |
|                                  |                                  |             | NP_944074.1 | dNMP kinase                                                 | Nucleotide metabolism                                       |                           |
|                                  |                                  |             | NP_944082.1 | gp53 baseplate wedge subunit                                | Viral particle associated                                   |                           |
|                                  |                                  |             |             | Genes of unknown function: 10                               |                                                             |                           |

| Classification               | Species | Genome ID   | Protein ID                    | Annotation                                                        | Functional Category                |
|------------------------------|---------|-------------|-------------------------------|-------------------------------------------------------------------|------------------------------------|
| <i>Bacteriophage S-PM2</i>   |         | NC_006820.1 | YP_195035.1                   | Site-specific DNA methylase Dam                                   | DNA/RNA processing                 |
|                              |         |             | YP_195130.1                   | Terminase subunit gp16                                            | Viral particle formation           |
|                              |         |             | YP_195144.1                   | Tail completion protein gp3                                       | Viral particle formation           |
|                              |         |             | YP_195148.1                   | Sigma factor for late transcription gp5                           | DNA/RNA processing                 |
|                              |         |             | YP_195157.1                   | Sliding clamp loader gp44                                         | DNA/RNA processing                 |
|                              |         |             | YP_195161.1                   | Putative cytosine-specific methyl transferase, C-terminal portion | DNA/RNA processing                 |
|                              |         |             | YP_195165.1                   | Small heat shock protein                                          | Translation and protein metabolism |
|                              |         |             | YP_195211.1                   | Photosystem II D1 protein                                         | Other metabolism                   |
|                              |         |             | YP_195214.1                   | Photosystem II D2 protein                                         | Other metabolism                   |
|                              |         |             | YP_195238.1                   | Head completion gp4                                               | Viral particle formation           |
|                              |         |             | YP_195267.1                   | Putative helicase                                                 | DNA/RNA processing                 |
|                              |         |             | Genes of unknown function: 17 |                                                                   |                                    |
| <i>Cyanophage P-SSM2</i>     |         | NC_006883.1 | YP_214238.1                   | T4-like loader of gp41 DNA helicase                               | DNA/RNA processing                 |
|                              |         |             | YP_214271.1                   | Helicase                                                          | DNA/RNA processing                 |
|                              |         |             | YP_214340.1                   | Dioxygenase                                                       | Other metabolism                   |
|                              |         |             | YP_214341.1                   | T4-like baseplate wedge                                           | Viral particle associated          |
|                              |         |             | YP_214374.1                   | RNA-DNA / DNA-DNA helicase ATPase                                 | DNA/RNA processing                 |
|                              |         |             | YP_214393.1                   | T4-like clamp loader subunit                                      | DNA/RNA processing                 |
|                              |         |             | YP_214417.1                   | Recombination and repair protein                                  | DNA/RNA processing                 |
|                              |         |             | YP_214418.1                   | T4-like recA-like recombination protein                           | DNA/RNA processing                 |
|                              |         |             | YP_214438.1                   | T4-like DNA primase                                               | DNA/RNA processing                 |
|                              |         |             | YP_214439.1                   | Ribonucleoside-diphosphate reductase                              | Nucleotide metabolism              |
|                              |         |             | YP_214490.1                   | NDP sugar epimerase/dehydratase                                   | Other metabolism                   |
|                              |         |             | Genes of unknown function: 19 |                                                                   |                                    |
| <i>Cyanophage P-SSM4</i>     |         | NC_006884.1 | YP_214609.1                   | N4C methyltransferase possible T4-like gp42 homologue             | DNA/RNA processing                 |
|                              |         |             | YP_214637.1                   | Redox protein                                                     | Other metabolism                   |
|                              |         |             | YP_214638.1                   | T4-like pyrimidine DNA glycosylase DenV                           | DNA/RNA processing                 |
|                              |         |             | YP_214650.1                   | gp14 T4-like neck protein                                         | Viral particle associated          |
|                              |         |             | YP_214658.1                   | Putative oxidoreductase                                           | Other metabolism                   |
|                              |         |             | YP_214677.1                   | RNA-DNA / DNA-DNA helicase ATPase, UvsW                           | DNA/RNA processing                 |
|                              |         |             | YP_214679.1                   | gp55 T4-like sigma factor late transxn                            | DNA/RNA processing                 |
|                              |         |             | YP_214680.1                   | gp47 T4-like endonuclease                                         | DNA/RNA processing                 |
|                              |         |             | YP_214682.1                   | gp46 T4-like endonuclease                                         | DNA/RNA processing                 |
|                              |         |             | YP_214684.1                   | PcyA, phycocyanobilin:ferredoxin oxidoreductase                   | Other metabolism                   |
|                              |         |             | YP_214691.1                   | gp62 T4-like clamp loader subunit                                 | DNA/RNA processing                 |
|                              |         |             | YP_214692.1                   | Translation repressor protein                                     | Translation and protein metabolism |
|                              |         |             | YP_214708.1                   | T4-like recA-like recombination protein, UvsX                     | DNA/RNA processing                 |
|                              |         |             | YP_214726.1                   | gp61 T4-like DNA primase                                          | DNA/RNA processing                 |
|                              |         |             | YP_214732.1                   | TalC, transaldolase                                               | Other metabolism                   |
|                              |         |             | Genes of unknown function: 5  |                                                                   |                                    |
| <i>Aeromonas phage 31</i>    |         | NC_007022.1 | YP_238758.1                   | gp61 T4-like DNA primase                                          | DNA/RNA processing                 |
|                              |         |             | YP_238890.1                   | Putative packaged DNA stabilization protein                       | Viral particle associated          |
|                              |         |             | YP_238934.1                   | Dihydrofolate reductase                                           | Nucleotide metabolism              |
| Genes of unknown function: 7 |         |             |                               |                                                                   |                                    |
| <i>Bacteriophage c-st</i>    |         | NC_007581.1 | YP_398521.1                   | Putative uracil permease                                          | Nucleotide metabolism              |
|                              |         |             | YP_398612.1                   | Putative IS transposase (OrfA)                                    | Mobile elements                    |
| Genes of unknown function: 6 |         |             |                               |                                                                   |                                    |
