# Supplementary material for: Horizontal gene transfer and nucleotide compositional anomaly in large DNA viruses
Source: PubMed Central journal article supplement (PMC2211322; doi:10.1186/1471-2164-8-456), 2007-12-10
Supplement: 1471-2164-8-456-S9.pdf [file 1471-2164-8-456-S9.pdf]

Summary of viral genes involved in the control of host defense system.

|                                        | Innate Immune System                                                                                                        |                                          |                      | Adaptive Immune System                                                                                                                         |                           | Apoptosis                                                                                                                                                                  | Other Pathways                                                   |
|----------------------------------------|-----------------------------------------------------------------------------------------------------------------------------|------------------------------------------|----------------------|------------------------------------------------------------------------------------------------------------------------------------------------|---------------------------|----------------------------------------------------------------------------------------------------------------------------------------------------------------------------|------------------------------------------------------------------|
|                                        | Cytokine                                                                                                                    | Chemokine                                | MHC Class I Homologs | Antigen Presentation Pathway                                                                                                                   | Antibody Interference     |                                                                                                                                                                            |                                                                  |
| <b>Poxvirus</b>                        | IL-10; <b>IL-18-BP</b> ;<br>IL-1 $\beta$ -R; <b>INF-R</b> ;<br>TNF-R; CD30;<br><b>CD150 (SLAM)</b> ;<br><b>CD200 (OX-2)</b> | <b>Chemokine</b> ;<br><b>Chemokine-R</b> | <b>MHC class I</b>   | LAP domain (MHC class I down regulation)                                                                                                       |                           | Ankyrin; Bcl-2; <b>FLIP</b> ;<br>dsRNA-binding protein;<br>eIF2 $\alpha$ ; M-T4;<br>Apoptosis regulator M11L; <b>Glutathione peroxidase</b> ; Serpin; <b>C-type lectin</b> | <b>Semaphorines</b> ;<br>Complement-binding protein; <b>CD47</b> |
| <b><math>\alpha</math>-herpesvirus</b> |                                                                                                                             |                                          |                      | ICP47 (inhibits peptide loading)                                                                                                               | Fc-binding protein        | ICP34.5 (GADD34); <b>Glycoprotein J</b> ; <b>RNA-binding protein interacting with PKR</b>                                                                                  | Complement-regulatory protein                                    |
| <b><math>\beta</math>-herpesvirus</b>  | <b>IL-10</b> ; TNF-R;<br><b>CD200 (OX-2)</b>                                                                                | <b>Chemokine</b> ;<br><b>Chemokine-R</b> | <b>MHC class I</b>   | MCMV/gp48 (directs MHC class I to lysosome);<br>MCMV/gp40 (downregulates MHC class I);<br><b>HCMV/US11 (causes degradation of MHC class I)</b> | <b>Fc-binding protein</b> | <b>vMIA</b>                                                                                                                                                                |                                                                  |
| <b><math>\gamma</math>-herpesvirus</b> | <b>IL-10</b> ; IL-6; INF regulatory factor (ICSBP)                                                                          | <b>Chemokine</b> ;<br><b>Chemokine-R</b> |                      | KSHV/K3,K5 (induce endocytosis of MHC class I)                                                                                                 |                           | <b>Bcl-2</b> ; FLIP                                                                                                                                                        | CCP (complement control protein); <b>LMP-1</b> ; <b>LMP-2A</b>   |
| <b>Asfarvirus</b>                      |                                                                                                                             |                                          |                      |                                                                                                                                                |                           | <b>C-type lectin</b> ; IAP; Bcl-2                                                                                                                                          | I $\kappa$ B (Inhibitor of NF $\kappa$ B)                        |
| <b>Baculovirus</b>                     |                                                                                                                             |                                          |                      |                                                                                                                                                |                           | <b>Inhibitor of apoptosis</b>                                                                                                                                              |                                                                  |
| <b>Iridovirus</b>                      |                                                                                                                             |                                          |                      |                                                                                                                                                |                           | <b>Caspase-1</b>                                                                                                                                                           |                                                                  |
| <b>Mimivirus</b>                       |                                                                                                                             |                                          |                      |                                                                                                                                                |                           | <b>EI24</b>                                                                                                                                                                |                                                                  |

For those highlighted by red, our analyses identified several genes in the 67 LDV genomes as cA genes. For EI24 (in blue), see text.
