# Supplementary material for: Horizontal gene transfer and nucleotide compositional anomaly in large DNA viruses
Source: PubMed Central journal article supplement (PMC2211322; doi:10.1186/1471-2164-8-456), 2007-12-10

A

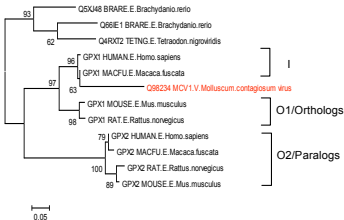

B

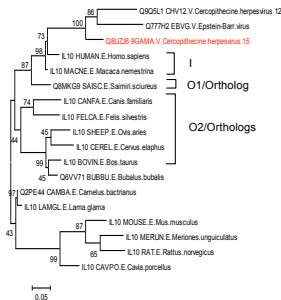

C

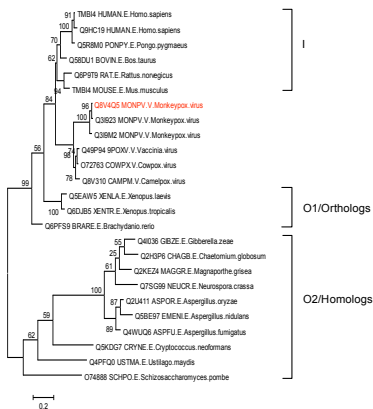

D

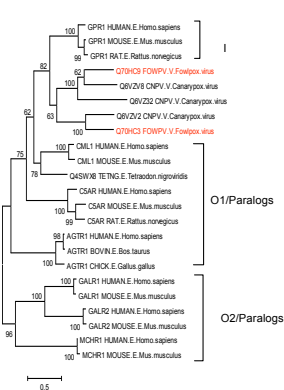

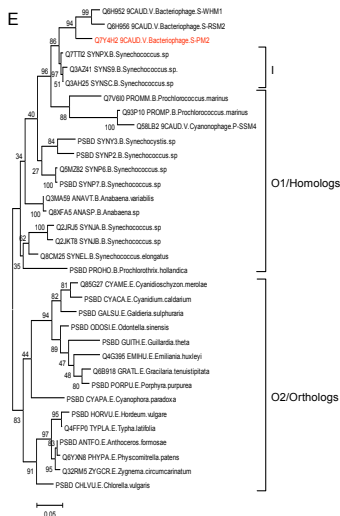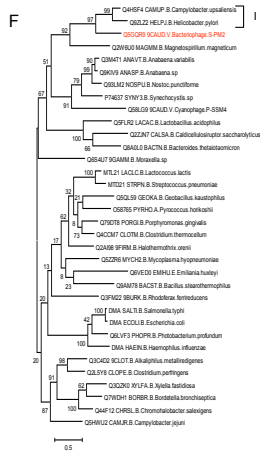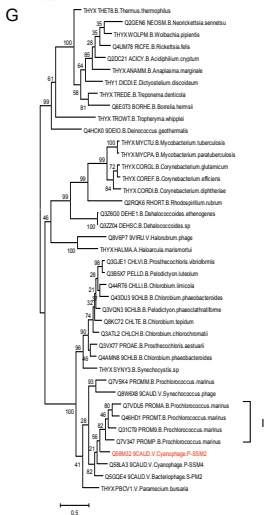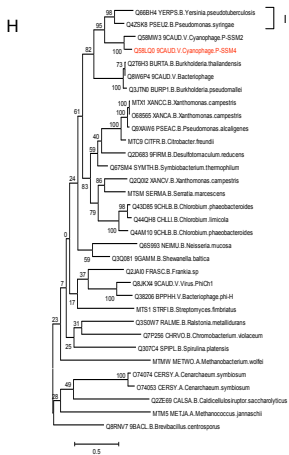

Supplement: 1471-2164-8-456-S10.pdf [file 1471-2164-8-456-S10.pdf]
