# Supplementary material for: Horizontal gene transfer and nucleotide compositional anomaly in large DNA viruses
Source: PubMed Central journal article supplement (PMC2211322; doi:10.1186/1471-2164-8-456), 2007-12-10
Supplement: 1471-2164-8-456-S11.pdf [file 1471-2164-8-456-S11.pdf]

Nucleotide sequence data for the hosts (or its close relatives) of the 67 LDVs.

| <b>Virus</b>                                      | <b>Representative Host</b>     | <b>Organisms Group Related to Host</b> | <b>Number of Non-redundant CDS</b> | <b>Total Number of Nucleotides</b> |
|---------------------------------------------------|--------------------------------|----------------------------------------|------------------------------------|------------------------------------|
| <i>African swine fever virus</i>                  | <i>Sus Scrofa</i>              |                                        | 887                                | 1169069                            |
| <i>Mamestra configurata NPV-A</i>                 | <i>Mamestra configurata</i>    | <i>Lepidoptera</i>                     | 899                                | 1135214                            |
| <i>Mamestra configurata NPV-B</i>                 | <i>Mamestra configurata</i>    | <i>Lepidoptera</i>                     | 899                                | 1135214                            |
| <i>Lymantria dispar MNPV</i>                      | <i>Lymantria dispar</i>        | <i>Lepidoptera</i>                     | 899                                | 1135214                            |
| <i>Xestia c-nigrum granulovirus</i>               | <i>Xestia nigrum</i>           | <i>Lepidoptera</i>                     | 899                                | 1135214                            |
| <i>Enterobacteria phage RB43</i>                  | <i>Enterobacteria</i>          | <i>Escherichia coli</i>                | 3862                               | 3978366                            |
| <i>Enterobacteria phage T4</i>                    | <i>Enterobacteria</i>          | <i>Escherichia coli</i>                | 3862                               | 3978366                            |
| <i>Pseudomonas phage phiEL</i>                    | <i>Pseudomonas</i>             | -                                      | 5248                               | 5520672                            |
| <i>Pseudomonas phage phiKZ</i>                    | <i>Pseudomonas</i>             | -                                      | 5248                               | 5520672                            |
| <i>Mycobacterium phage Bxz1</i>                   | <i>Mycobacterium</i>           | -                                      | 3695                               | 3950490                            |
| <i>Enterobacteria phage RB69</i>                  | <i>Enterobacteria</i>          | <i>Escherichia coli</i>                | 3862                               | 3978366                            |
| <i>Enterobacteria phage RB49</i>                  | <i>Enterobacteria</i>          | <i>Escherichia coli</i>                | 3862                               | 3978366                            |
| <i>Vibrio phage KVP40</i>                         | <i>Vibrio parahaemolyticus</i> | -                                      | 4161                               | 4368585                            |
| <i>Aeromonas phage 44RR2.8t</i>                   | <i>Aeromonas</i>               | -                                      | 536                                | 537623                             |
| <i>Aeromonas phage Aeh1</i>                       | <i>Aeromonas</i>               | -                                      | 536                                | 537623                             |
| <i>Bacteriophage S-PM2</i>                        | <i>Synechococcus</i>           | -                                      | 5945                               | 6009849                            |
| <i>Cyanophage P-SSM2</i>                          | <i>Cyanobacteria</i>           | <i>Prochlorococcus</i>                 | 2779                               | 2597712                            |
| <i>Cyanophage P-SSM4</i>                          | <i>Cyanobacteria</i>           | <i>Prochlorococcus</i>                 | 2779                               | 2597712                            |
| <i>Aeromonas phage 31</i>                         | <i>Aeromonas</i>               | -                                      | 536                                | 537623                             |
| <i>Bacteriophage c-st</i>                         | <i>Clostridium botulinum</i>   | -                                      | 22                                 | 34160                              |
| <i>Pongine herpesvirus 4</i>                      | <i>Simians</i>                 | <i>Cercopithecus</i>                   | 104                                | 139805                             |
| <i>Human herpesvirus 4</i>                        | <i>Homo sapiens</i>            | -                                      | 22454                              | 34617928                           |
| <i>Human herpesvirus 6B</i>                       | <i>Homo sapiens</i>            | -                                      | 22454                              | 34617928                           |
| <i>Murid herpesvirus 1</i>                        | <i>Mus musculus</i>            | -                                      | 22626                              | 33882315                           |
| <i>Cercopithecine herpesvirus 16</i>              | <i>Simians</i>                 | <i>Cercopithecus</i>                   | 104                                | 139805                             |
| <i>Human herpesvirus 5 strain AD169</i>           | <i>Homo sapiens</i>            | -                                      | 22454                              | 34617928                           |
| <i>Equid herpesvirus 1</i>                        | <i>Equus caballus</i>          | -                                      | 196                                | 244763                             |
| <i>Equid herpesvirus 2</i>                        | <i>Equus caballus</i>          | -                                      | 196                                | 244763                             |
| <i>Cercopithecine herpesvirus 1</i>               | <i>Simians</i>                 | <i>Cercopithecus</i>                   | 104                                | 139805                             |
| <i>Human herpesvirus 6</i>                        | <i>Homo sapiens</i>            | -                                      | 22454                              | 34617928                           |
| <i>Human herpesvirus 7</i>                        | <i>Homo sapiens</i>            | -                                      | 22454                              | 34617928                           |
| <i>Human herpesvirus 2</i>                        | <i>Homo sapiens</i>            | -                                      | 22454                              | 34617928                           |
| <i>Human herpesvirus 1</i>                        | <i>Homo sapiens</i>            | -                                      | 22454                              | 34617928                           |
| <i>Psittacid herpesvirus 1</i>                    | <i>Psittacidae</i>             | -                                      | 8                                  | 9649                               |
| <i>Gallid herpesvirus 2</i>                       | <i>Gallus gallus</i>           | -                                      | 17526                              | 30024643                           |
| <i>Cercopithecine herpesvirus 15</i>              | <i>Simians</i>                 | <i>Cercopithecus</i>                   | 104                                | 139805                             |
| <i>Cercopithecine herpesvirus 8</i>               | <i>Simians</i>                 | <i>Cercopithecus</i>                   | 104                                | 139805                             |
| <i>Murid herpesvirus 2</i>                        | <i>Rattus norvegicus</i>       | -                                      | 22708                              | 37114122                           |
| <i>Human herpesvirus 5 strain Merlin</i>          | <i>Homo sapiens</i>            | -                                      | 22454                              | 34617928                           |
| <i>Gallid herpesvirus 3</i>                       | <i>Gallus gallus</i>           | -                                      | 17526                              | 30024643                           |
| <i>Cercopithecine herpesvirus 2</i>               | <i>Simians</i>                 | <i>Cercopithecus</i>                   | 104                                | 139805                             |
| <i>Meleagrid herpesvirus 1</i>                    | <i>Meleagris gallopavo</i>     | <i>Meleagris</i>                       | 50                                 | 55174                              |
| <i>Tupaiaid herpesvirus 1</i>                     | <i>Tupaia glis</i>             | <i>Tupaia</i>                          | 22                                 | 26589                              |
| <i>Ostreid herpesvirus 1</i>                      | <i>Ostreidae</i>               | -                                      | 63                                 | 79203                              |
| <i>Lymphocystis disease virus - isolate China</i> | <i>Fish</i>                    | <i>Danio rerio</i>                     | 6841                               | 8893321                            |
| <i>Invertebrate iridescent virus 6</i>            | <i>Invertebrate</i>            | <i>Lepidoptera</i>                     | 899                                | 1135214                            |
| <i>Acanthamoeba polyphaga mimivirus</i>           | <i>Acanthamoeba</i>            | <i>Acanthamoeba castellanii</i>        | 24                                 | 40605                              |
| <i>Shrimp white spot syndrome virus</i>           | <i>Penaeus</i>                 | -                                      | 24                                 | 38013                              |
| <i>Emiliana huxleyi virus 86</i>                  | <i>Emiliana huxleyi</i>        | -                                      | 5                                  | 4824                               |
| <i>Paramecium bursaria Chlorella virus 1</i>      | <i>Zoochlorella</i>            | <i>Chlorella</i>                       | 18                                 | 26637                              |
| <i>Ectocarpus siliculosus virus 1</i>             | <i>Ectocarpus siliculosus</i>  | <i>Ectocarpus</i>                      | 2                                  | 2811                               |
| <i>Monkeypox virus</i>                            | <i>Simians / Homo sapiens</i>  | <i>Homo sapiens</i>                    | 22454                              | 34617928                           |
| <i>Camelpox virus</i>                             | <i>Camelus</i>                 | -                                      | 25                                 | 19314                              |
| <i>Cowpox virus</i>                               | <i>Bos taurus</i>              | -                                      | 1870                               | 2582299                            |
| <i>Myxoma virus</i>                               | <i>Oryctolagus cuniculus</i>   | <i>Oryctolagus</i>                     | 70                                 | 86917                              |
| <i>Rabbit fibroma virus</i>                       | <i>Oryctolagus cuniculus</i>   | <i>Oryctolagus</i>                     | 70                                 | 86917                              |
| <i>Ectromelia virus</i>                           | <i>Mus musculus</i>            | -                                      | 22626                              | 33882315                           |
| <i>Variola virus</i>                              | <i>Homo sapiens</i>            | -                                      | 22454                              | 34617928                           |
| <i>Molluscum contagiosum virus</i>                | <i>Homo sapiens</i>            | -                                      | 22454                              | 34617928                           |
| <i>Canarypox virus</i>                            | <i>Passeriformes</i>           | -                                      | 43                                 | 56253                              |
| <i>Melanoplus sanguinipes entomopoxvirus</i>      | <i>Melanoplus sanguinipes</i>  | <i>Melanoplus</i>                      | 0                                  | 0                                  |
| <i>Fowlpox virus</i>                              | <i>Fowl</i>                    | <i>Gallus gallus</i>                   | 17526                              | 30024643                           |
| <i>Amsacta moorei entomopoxvirus 'L'</i>          | <i>Amsacta moorei</i>          | <i>Lepidoptera</i>                     | 899                                | 1135214                            |
| <i>Lumpy skin disease virus</i>                   | <i>Bos taurus</i>              | -                                      | 1870                               | 2582299                            |
| <i>Mule deer poxvirus</i>                         | <i>Odocoileus hemionus</i>     | <i>Odocoileinae</i>                    | 7                                  | 6369                               |
| <i>Yaccinia virus</i>                             | <i>Homo sapiens</i>            | -                                      | 22454                              | 34617928                           |
| <i>Heliothis zea virus 1</i>                      | <i>Heliothis zea</i>           | <i>Lepidoptera</i>                     | 899                                | 1135214                            |
